1 **Quantifying climate change impacts emphasises the**  
2 **importance of managing regional threats in an endangered**  
3 **species**

4 Thomas Mattern<sup>1,2,\*</sup>, Stefan Meyer<sup>1</sup>, Ursula Ellenberg<sup>2</sup>, David M. Houston<sup>3</sup>,  
5 John T. Darby<sup>4</sup>, Melanie Young<sup>1</sup>, Yolanda van Heezik<sup>1</sup>, Philip J. Seddon<sup>1</sup>

6 <sup>1</sup> Department of Zoology, PO Box 56, University of Otago, Dunedin, NZ

7 <sup>2</sup> Department of Ecology, Environment and Evolution, La Trobe University, Melbourne, Australia

8 <sup>3</sup> Science and Policy Group, Department of Conservation, Private Bag 68 908, Newton, Auckland,  
9 NZ

10 <sup>4</sup> Otago Museum, PO Box 6202, Dunedin, NZ

11 \* corresponding author: (email) [t.mattern@eudypes.net](mailto:t.mattern@eudypes.net), (phone) +64 27 6003036

## 12 **Abstract**

13 As a global issue the effects of climate change are difficult to manage on a region scale. However,  
14 more often than not it is only one of many problems that need to be addressed in species  
15 conservation. Non-climatic factors – especially those of anthropogenic origins – play equally if  
16 not more important roles with regards to population developments of species and often provide  
17 much better footholds for conservation activities. We examined the population trends of the  
18 endangered Yellow-eyed penguin (*Megadyptes antipodes*) in New Zealand using monitoring data  
19 dating back to the 1980s. We developed a Bayesian population model incorporating various  
20 climatic factors to assess the relative influence of climate change on the penguin numbers over  
21 the past 30 years. Sea surface temperature (SST) proved to be the dominating factor influencing  
22 survival of both adult birds and fledglings. Increasing SST since the mid-1990s went along with a  
23 reduction in survival rates and population decline. The population model showed that 33% of  
24 the variation in population numbers could be explained by SST alone, significantly increasing  
25 pressure on the penguin population. Consequently, the population becomes less resilient to non-  
26 climate related impacts, such as fisheries interactions, habitat degradation and human  
27 disturbance. But their exact contribution towards population trends is extremely difficult to  
28 assess principally due to the absence of quantifiable data. This potentially creates an analysis  
29 bias towards climate variables, effectively distracting from non-climate factors that can be  
30 managed on a regional scale to ensure the viability of the population.

## 31 **Keywords**

32 Climate change, anthropogenic threats, population modelling, survival, species management,  
33 penguins

## 34 **1. Introduction**

35 Climate change significantly alters the phenology and distribution of the world's fauna and flora  
36 (Parmesan 2006). In particular, species with spatially limited distributions suffer from climate-  
37 related change in their habitats which can drive range shifts (e.g. Grémillet and Boulinier 2009;  
38 Sekercioglu et al. 2008), range restrictions (Sexton et al. 2009) or, in the worst case, extinction  
39 (Thomas et al. 2004). Current climate predictions suggest that the pressure on ecosystems will  
40 continue to increase (Stocker 2014), especially affecting species that occupy fragmented  
41 habitats. The spatial segregation of suitable habitat might preclude range shift adjustments and  
42 increase the risk of local extinctions (Opdam and Wascher 2004).

43 For species conservation, this creates a daunting scenario. With resources for conservation often  
44 limited, the inevitability of climate change could be used as an argument against taking action to  
45 conserve species at locations that could be predicted to become sub-optimal due to  
46 environmental change (Sitas et al. 2009). However, more often than not, cumulative  
47 anthropogenic impacts (e.g. habitat destruction, pollution, resource competition, accidental  
48 mortality) significantly add to – or even exceed – the impact of climate-related environmental  
49 change (Parmesan and Yohe 2003; Trathan et al. 2015). While climate change is a global issue  
50 that is difficult to tackle on a regional scale, addressing local-scale anthropogenic factors could  
51 enhance species resilience to environmental change.

52 The New Zealand endemic Yellow-eyed penguin (YEP, *Megadyptes antipodes*) illustrates the  
53 complexity of this issue. YEP is a species of significant cultural and economic value for New  
54 Zealand (Seddon et al. 2013a). Particularly the tourism industry of the Otago Peninsula benefits  
55 from the presence of the birds with the annual contribution per breeding pair to the local  
56 economy estimated to range around NZ\$250,000 (Tisdell 2007). Ensuring the survival of the  
57 species is therefore not only a matter of ethical considerations, but also of economic importance.  
58 With an estimated 1,700 breeding pairs it is one of the rarest penguin species world-wide  
59 (Garcia Borboroglu and Boersma 2013). Compared to other penguins, the YEP's distributional

60 range is fairly limited. About 60% of the species' population is thought to inhabit the sub-  
61 Antarctic Auckland and Campbell Islands, while the remaining ~40% breed along the south-  
62 eastern coastline of New Zealand's South Island (Seddon et al. 2013a). Genetic analyses revealed  
63 that there is virtually no gene flow between the sub-Antarctic and mainland YEP populations  
64 (Boessenkool et al. 2009b).

65 While little is known about the sub-Antarctic populations, mainland YEPs have received  
66 considerable scientific attention. The first comprehensive studies of breeding biology and  
67 population dynamics were carried out in the first half of the 20<sup>th</sup> century by Lance Richdale  
68 (Richdale 1949, 1951, 1957). Interest in the species waned after Richdale's retirement from  
69 active research, but was rekindled in the late 1970s (Darby 1985b). Regular monitoring of some  
70 breeding sites commenced in the early 1980s, and was expanded and intensified following a  
71 catastrophic die-off affected breeding adult penguins on the Otago Peninsula in the austral  
72 summer of 1989-90 (Efford et al. 1996). Parts of the population have been monitored without  
73 interruption since 1982 resulting in a data set spanning more than three decades (Ellenberg and  
74 Mattern 2012). Numbers of breeding pairs have been subject to considerable inter-annual  
75 fluctuations making it difficult to identify long-term trends (Seddon et al. 2013a). Yet, a recent  
76 review of available information revealed that a steady decline of the population might have been  
77 masked by more intensive monitoring in the past decades (Ellenberg and Mattern 2012).

78 Most New Zealand penguin species including YEPs are believed to have undergone significant  
79 population declines in the past century, with climate change suspected to be playing a major role  
80 (e.g. Peacock et al. 2000, Cunningham and Moors 1994). At the same time, penguin populations  
81 are exposed to numerous anthropogenic threats (Trathan et al. 2015). Climatic variables and  
82 anthropogenic influences create a complex mix of factors that make it challenging to decipher  
83 the causation of population developments.

84 Using population data recorded between 1982 and 2015 from one of the YEP's mainland  
85 strongholds, we set out to develop a population model that integrates observed population  
86 changes with key climatic variables. While climate data is readily available as continuous data

87 sets, data on anthropogenic factors is often sparse or of low temporal and spatial resolution  
88 which inhibits quantitative analysis. We assess to which extent population trends can be  
89 attributed to climate change and discuss the importance of other, more manageable threats for  
90 the long-term viability of the mainland YEP population.

## 91 **2. Methods**

### 92 **2.1 Species information**

93 The IUCN Red list classifies Yellow-eyed penguins as “Endangered” (BirdLife International  
94 2012), and they are listed as “Nationally Vulnerable” under the New Zealand Threat  
95 Classification System (Robertson et al. 2013). The three main subpopulations are estimated to  
96 range between 520-570 breeding pairs (Auckland Islands), 350-540 pairs on Campbell Island,  
97 and 580-780 pairs along New Zealand’s south-eastern coastlines and Stewart Island (Seddon et  
98 al. 2013b). On the mainland, the Otago Peninsula represents the species’ stronghold where  
99 numbers of breeding pairs in the past three decades have been as high as 385 in 1996, but have  
100 steadily declined over the last 20 years to only 108 pairs in 2011 (Ellenberg and Mattern 2012).  
101 Yellow-eyed penguins breed in the austral summer (September-February) so that their annual  
102 breeding period spans the turn of the calendar year. Socialising and courtship in July marks the  
103 onset of a new breeding season that ends in March/April with annual moult and subsequent  
104 replenishing of resources in preparation for the next breeding season (Seddon et al. 2013a).  
105 Hence, we used austral year (i.e. July to June) to calculate means and for summarising annual  
106 statistics of demographic and environmental parameters.

### 107 **2.2 Study sites**

108 The Otago Peninsula penguin population has received considerable scientific attention in the  
109 past century, with Richdale conducting his seminal population research between 1936 and 1954  
110 (Richdale 1949, 1951, 1957), followed by a string of projects from the 1980s onwards  
111 addressing many aspects of the Yellow-eyed penguin’s biology including phylogeny (e.g.  
112 Boessenkool et al. 2009a), breeding biology (e.g. Darby and Seddon 1990), diet (e.g. van Heezik

113 1990), foraging ecology (e.g. Mattern et al. 2007), and conservation (e.g. Ellenberg et al. 2007).  
114 While Richdale conducted most of his work at Kumo Kumo Whero Bay, most of the recent  
115 research was carried out at the Boulder Beach complex (Fig 1) which, as a result, has the longest  
116 ongoing population monitoring program and the most reliable data set available (Ellenberg and  
117 Mattern 2012).

## 118 **2.3 Population monitoring & Yellow-eyed penguin database (YEPDB)**

119 Flipper banding of Yellow-eyed penguins commenced at Boulder Beach in the 1970s and by the  
120 mid-1980s the majority of the local population was marked. Annual nest searches were  
121 conducted to determine number of breeders and repeated nest checks provided information on  
122 identity and reproductive success (Darby 1985a). After a catastrophic adult die-off during the  
123 1989 breeding season (Gill and Darby 1993), monitoring was intensified to include 60% of the  
124 known South Island breeding sites (Seddon et al. 2013b). The Yellow-eyed penguin database  
125 (YEPDB) was created in the early 1990s (Efford et al. 1994) and is maintained by the New  
126 Zealand Department of Conservation (DOC) which also oversees the YEP monitoring program.  
127 At the time of writing, the database contained banding records for 13,788 penguins (date range:  
128 1973-2013), and 9,006 nest records (range: 1979-2014). It also holds information on incidental  
129 penguin recoveries or sightings outside the breeding season; however, these recovery data are  
130 patchy and were deemed too unreliable for analysis.

## 131 **2.4 Data**

### 132 ***2.4.1 Demographic data***

133 Nearly one third of all banding records (n=3,733) and nest records (n=2,342) originate from  
134 Boulder Beach (Fig 1) providing consistent, uninterrupted monitoring data for our analyses.  
135 While monitoring commenced in the late 1970s, first complete data sets are available from 1982  
136 onwards, although for the first season there are only records of six nests.  
137 Data were extracted from YEPDB as a series of SQL queries. Population numbers were retrieved  
138 from the table holding nest records. Number of breeding adults is number of nests times two;

139 number of fledglings is the sum of chicks fledged from all nests, and number of new breeders  
140 represents the sum of all adults that were recorded for the first time as breeders. Where  
141 possible we determined age of breeding birds per year by querying their banding details; age is  
142 unknown for birds banded as adults (ca. 15% of all banded birds).

143 To estimate demographic parameters, we first extracted ID numbers for individuals banded at  
144 the Boulder Beach complex since 1982. Secondly, we identified the years in which each bird was  
145 recorded as a breeding adult in the nest record table. Finally, we compiled the information from  
146 both database queries into a table where each column represented a nest year and rows  
147 comprised encounter histories for each individual. Birds had to miss out at least two consecutive  
148 breeding seasons before being defined as dead or senescent. In a small number of cases a bird  
149 was not recorded as a breeder for three or more consecutive years before reemerging as a nest  
150 occupant, but this applied to fewer than 1% of all birds.

#### 151 **2.4.2 Environmental data**

152 We obtained monthly averages for selected climatic variables deemed likely to have an influence  
153 on demographic parameters (Table 1). The National Climate Database (CliFlo,  
154 <http://cliflo.niwa.co.nz>) has kept records from weather stations in Dunedin and the Otago  
155 Peninsula continuously since the early 20<sup>th</sup> century. Austral annual means were calculated for  
156 each parameter (i.e. July – June) as well as for the months March to May, which covers the  
157 penguins' annual moult and post-moult periods. During this time birds are particularly  
158 susceptible to environmental perturbations due the increased energy requirements for feather  
159 replacement (Croxall 1982). Data on local sea surface temperatures (SST) were obtained from  
160 the Portobello Marine Laboratory (University of Otago) which holds a near continuous time  
161 series of daily measurements dating back to January 1953. We calculated the monthly SST  
162 anomaly by subtracting monthly means from the average value calculated from all monthly  
163 means ranging from January 1953 to December 2014; annual SST anomaly is the mean of  
164 monthly SST anomalies for the corresponding year. To examine for potential lag effects of SST

165 anomaly on prey availability (see Beentjes and Renwick 2001), we also examined SST anomalies  
166 shifted backwards in time by one and two years.

## 167 **2.5 Population model**

168 We estimated adult survival and fledgling survival by developing a Bayesian mark-recapture  
169 (MR) model that incorporated effects of climate parameters. Chicks are only banded shortly  
170 before fledging, so that the MR model could not consider hatchlings that died before they were  
171 marked (i.e. chick survival). Hence, fledgling survival was adjusted by incorporating the  
172 proportion of chicks fledged to chicks hatched. We modelled survival in any year as a random  
173 process ranging around a mean of zero within the bounds of a total temporal variance. This  
174 allowed us to determine the relative importance of each climate covariate in terms of percentage  
175 of total variance explained (Grosbois et al. 2008). For models with covariates explaining at least  
176 20% of the total variance, we estimated posterior model probabilities using Gibbs Variable  
177 Selection (GVS, Tevacchia et al. 2016)

178 Subsequently, we modelled YEP population dynamics via a female-only model assuming a birth-  
179 pulse population (Tang and Chen 2002). The effect of environmental factors on the population  
180 growth rate was examined by using fixed survival rates (means) within the population model,  
181 allowing it to approximate the deterministic population growth rate between 1982 and 2014.  
182 Similarly, we estimated the population growth rate by changing mean survival rates  
183 corresponding to low SSTs that were measured from 1982 to 1996, and high SSTs characteristic  
184 for the time period from 1997 to 2015. Finally, we projected future populations by running a  
185 series of stochastic projections that used a range of survival rate estimates (i.e. omitting years  
186 with increasing uncertainty in estimate validity) and predicted trends in influential  
187 environmental factors.

188 Detailed descriptions of all modelling procedures are provided as Electronic Supplementary  
189 Material (ESM1).



## 190 **2.6 Comparison with historic population trends**

191 Richdale (1957) provides comprehensive data on penguin demography allowing it to draw  
192 comparisons between historic and contemporary penguin numbers. We inferred population  
193 parameters from three tables. Table 67 (p147) provides direct information about the number of  
194 eggs laid and chicks fledged. Using number of eggs, we inferred the number of nests for the  
195 reported years by assuming only two-egg clutches were present. In table 72 (p154), Richdale  
196 reports the percentage of surviving breeders of both sexes for each year, adjusted to the  
197 fractional format by dividing the reported values by 100. Finally, table 62 (p138) provides clues  
198 about annual recruitment, which was calculated as proportion of new breeders each year. We  
199 omitted Richdale's data for the 1936 season and for the seasons following 1949, as he noted less  
200 frequent monitoring and incomplete data sets for the initial and the latter years of his study  
201 (Richdale 1957).

## 202 **3. Results**

### 203 **3.1 Observed penguin numbers**

204 Numbers of adult breeders at Boulder Beach fluctuated considerably between 1982 and 2015  
205 (Fig 2). Immigration of birds that had been banded outside Boulder Beach was a rare occurrence  
206 throughout the study period (mean proportion of immigrants per year 1982-2015:  $2.7 \pm 2.2\%$ ). If  
207 birds banded as breeders are considered to come from elsewhere, the median immigration is  
208 similar (2.0%) although three years (1991, 2010 and 2012) would stand out where unbanded  
209 adults made up 11, 10 and 8% of the breeding population, respectively. An apparent rise in  
210 penguin numbers at the beginning of the monitoring period (i.e. 1982-1985) reflects increasing  
211 monitoring effort. Reduced monitoring effort may explain the drop in numbers after 1985-86;  
212 two areas were not monitored in several years (A1: 1986-1989; Highcliff: 1989). Both areas  
213 account for  $46 \pm 4\%$  of penguin counts (1990-2015), so that true penguin numbers in 1989 were  
214 likely higher than the database would suggest. Breeder numbers in the two areas monitored in  
215 1989 (Midsection; Double Bay) dropped by 62% in the following season (1989: 74 birds, 1990:

216 28 birds) when the population was affected by a catastrophic adult die-off. The population  
217 recovered between 1990 and 1996 to reach levels comparable to those observed in 1985. The  
218 1996 season had the highest numbers of breeders recorded at Boulder Beach (n=242) and  
219 represents a turning point for the population. Subsequently penguin numbers reached a low of  
220 104 breeders in 2002, with losses compounded by another adult die-off event occurring in the  
221 2001 season. Between 2002 and 2012 the population fluctuated between 100 and 150 breeders  
222 without any apparent trend before another drastic decline in numbers began in the years  
223 following a third adult die-off event at the end of the 2012 season. The steepest drop in numbers  
224 (41%) recorded since 1989 occurred between 2013 (128 breeders) and 2014 (76 breeders). In  
225 2015, only 58 breeding penguins were recorded, which translates to a 76% decline in numbers  
226 since 1996.

227 Number of chicks that fledged each year generally followed the trends observed for adults (Fig.  
228 2). However, significant variation between 2003 and 2010 reflects a series of years with poor  
229 breeding success followed by better reproductive output in the following year. Numbers of new  
230 breeders showed a similar albeit weakened pattern delayed by 5 years: starting in 2004,  
231 numbers of new breeders seem to mimic those of fledglings beginning in 1999.

232 Age of breeding birds ranged between 8.4 years (1984) and 14.9 years (1990, mean:  $12 \pm 1.4$   
233 years, Fig. 3). Between 1990 and 2015 the average age of returning breeders showed a slightly  
234 decreasing trend from around 14 to 11 years (Pearson correlation  $\rho = -0.307$ ,  $t_{24} = -1.5781$ ,  
235  $p = 0.13$ ). At the same time, average age of new breeders dropped significantly from more than 10  
236 years in the 1990s to only 4 years in 2015 ( $\rho = -0.796$ ,  $t_{24} = -1.5781$ ,  $p < 0.001$ ). The average age of  
237 new breeders increased steeply after both the 1989 and 2001 adult die-offs (Fig 3) indicating a  
238 substantial pool of older non-breeders ready to recruit following the disappearance of  
239 established breeders. No such spike is apparent after the 2012 die-off suggesting that the pool of  
240 older recruits has dried up over the last decade.

## 241 **3.2 Demographic estimates from the mark-recapture model**

242 The MR model without covariate revealed a fledgling survival rate of 0.12 (95%, Credible  
243 Interval: 0.08, 0.19) in chicks (Table 2). The survival of adults was 0.87 (95%, CrI: 0.83, 0.90).  
244 Throughout the study period (1982-2014), fledgling survival varied 2.56 times more than adult  
245 survival (95%, CrI: 1.03, 6.45) (Table 2).

246 Years with increased wind activity had a positive effect on fledgling survival, whereas the effect  
247 of higher than normal SST was negative; both covariates explained 33.2% of the variance (Table  
248 3a). Similarly, SST anomaly in the previous year and during the first three months after fledging  
249 had an effect on survival, explaining 16.5% and 24.8% of the variance. Furthermore, years with  
250 increased SST had a negative effect on fledgling survival, explaining between 12 and 15% of the  
251 variance (Table 3a).

252 In adults, SST had the greatest effect on the survival rate, explaining 36.8% of the variance  
253 (Table 3b). The relationship of adult survival and SST becomes apparent when the deviation of  
254 annual adult survival from the median survival rate is plotted against SST anomaly (Fig 4). In  
255 periods with cooler than usual SST, adult survival was high (e.g.1990-1996), whereas warm  
256 periods were characterized by lower adult survival. The same was true for air temperature.  
257 Warmer years were associated with reduced adult survival; air temperature-related covariates  
258 explained 34.4% of the variation in adult survival (Table 3b).

259 Refitting the MR model with the two most influential explanatory covariates each for fledging  
260 and adult survival, and subsequent assessment of posterior model probability, ranked highest  
261 the model where both chick and adult survival were fitted to the single covariate SST anomaly  
262 (Table 4).

## 263 **3.3 Predictions for the adult female population**

264 Using year-specific survival rates from the MR model generates predictions of numbers of adults  
265 that were similar to those determined during monitoring. For most years, the observation-based

266 number of adult female YEPs and the 95% credible intervals for the predicted number of adult  
267 female YEPs overlapped (Fig 5).

268 Based on a deterministic model (i.e. without temporal variance in survival rates) the population  
269 growth rate was 1.02 (95% CrI 0.98, 1.06) per year throughout the entire study period. For the  
270 time period when SST was below average (1982 to 1996, Fig. 4) the population showed an  
271 increasing trend with a growth rate of 1.038 (95% CrI 0.99, 1.080, Fig 6). However, from 1996  
272 onwards an ongoing period of mainly warmer than normal SST went along with a growth rate of  
273 0.94 (95% CrI 0.90, 0.98) indicating a population decline (Fig 6).

### 274 **3.4 Future projections**

275 Based on projections of increasing SST at a rate of 0.02°C per year in the next decades (Oliver et  
276 al. 2014), the penguin population at Boulder Beach will continue to decline. Stochastic  
277 simulations using the most reliable estimates for adult survival (1982-2012) suggest that the  
278 number of adult female penguins will drop below 10 individuals by 2048 (Fig 5a). If the recent  
279 poor breeding years 2013-2015 are included this negative trend gets progressively worse (Fig  
280 5b-d). Including adult survival rates estimated for 2015, the mean projection predicts YEPs to be  
281 locally extinct by 2043.

## 282 **4. Discussion**

283 Numbers of Yellow-eyed penguins at Boulder Beach have declined since 1996 (Figs 5&6). The  
284 local population seemed to experience a reprieve from this decline in the first decade of the new  
285 millennium, despite unfavourable climatic conditions at that time. This might have been driven  
286 by a temporary reduction in other, non-climate negative impacts, the nature of which remain  
287 unclear due to a lack of data.

288 The ages of breeding penguins provide some explanation about the underlying mechanics of the  
289 population decline. In the years following the 1989 and 2001 adult die-offs, the average age of  
290 new breeders recruited into the population was substantially higher than in the years prior to  
291 the events. All of these birds were locally banded individuals, which suggests that there was a

292 pool of older, previously unpaired birds which replaced experienced breeders that had died  
293 during the event. After the 2012 die-off, the mean age of new breeders reached an historic low  
294 (4.1 years, Fig 3). Hence, old breeders that had lost their partner now paired up with younger  
295 penguins indicating that the pool of older bachelors available to replace lost birds had  
296 disappeared. This is supported by the number of recruits reflecting the marked variation in  
297 fledgling numbers with a 5-year-lag (Fig 2). It appears that since the turn of the century,  
298 penguins recruit into the breeding population at the earliest possible opportunity. This likely has  
299 negative effects on breeding performance since in seabirds age is an important determinant for  
300 foraging success (e.g. Daunt et al. 2007; Zimmer et al. 2011) and subsequently reproductive  
301 success (e.g. Limmer and Becker 2009; Nisbet and Dann 2009). The decline in the mean age of  
302 new breeders in recent years indicates that more inexperienced birds are recruiting as breeders,  
303 and possibly explains the overall deteriorating reproductive success.

304 When the 2012 die-off of adult breeding birds occurred, penguin numbers were less than 60% of  
305 what they had been in the mid-1990s (Fig 2). While the penguin population showed a  
306 remarkably recovery after the 1989 event this did not happen following 2012; instead numbers  
307 have continued to decline. The most apparent differences following the two die-offs are the  
308 trends in ocean temperatures with a cooler-than-normal period in the first half of the 1990s  
309 whereas SST has been almost continuously higher than the 1953-2014 average since the late  
310 1990s (Fig 4).

#### 311 **4.1 Sea surface temperature effects**

312 Sea surface temperature explained 33% of the variation in observed population trends. Hence,  
313 SST is an important driver of penguin numbers. Years with warmer than usual SST result in  
314 reduced adult survival, whereas the reverse is true when SST is cooler.

315 Variation in SST likely influences the abundance and quality of YEP prey. In Little penguins  
316 (*Eudyptula minor*) breeding on the Otago Peninsula, climatic fluctuations – and connected to  
317 this, ocean temperatures – were found to affect prey composition (Perriman et al. 2000). Little  
318 penguins are generalist foragers that take a variety of pelagic prey (Dann 2013), most likely a

319 beneficial trait in relation to climate related change in resource abundance (Thuiller et al. 2005).  
320 YEPs on the other hand, are principally benthic foragers (Mattern et al. 2007) that feed  
321 predominantly on demersal species (e.g. Browne et al. 2011; Moore and Wakelin 1997; van  
322 Heezik 1990). Although this specialisation reduces competition for pelagic prey with the  
323 abundant marine avifauna in New Zealand (Mattern et al. 2007), it comes at the cost of reduced  
324 behavioural flexibility to respond to changes in prey distribution or abundance (e.g. Browne et  
325 al. 2011; Mattern et al. 2013).

326 Temperature affects the annual biomass of many fish species in New Zealand (Beentjes and  
327 Renwick 2001). Warmer than normal conditions negatively affect spawning in fish, reducing  
328 subsequent recruitment (e.g. Takasuka et al. 2008). Abundance of the demersal red cod  
329 (*Pseudophycis bacchus*), historically an important prey species for YEP from Boulder Beach  
330 (Moore and Wakelin 1997; van Heezik 1990), shows a strong correlation to SST fluctuations,  
331 albeit with a lag of 14 months (Beentjes and Renwick 2001). At Boulder Beach, a reduction in  
332 body mass of breeding YEPs in 1985 when compared to 1984 was associated with lower  
333 quantities of red cod taken (van Heezik and Davis 1990). 1983 featured cooler than normal SST  
334 (mean monthly SST anomaly: -0.73), while 1984 temperatures were above average (SST  
335 anomaly: 0.17). As such the lagged correlation between SST and red cod abundance reported by  
336 Beentjes & Renwick (2001) also seems to be manifested in penguin body condition. This  
337 explains the relative importance of the corresponding covariate (i.e. `sst_anomaly_minus1year`)  
338 for survival rates (Table 3a&b) and corresponds to findings of a previous analysis of climate  
339 variables on YEP numbers (Peacock et al. 2000).

340 However, model selection showed an even stronger direct SST effect (Table 4). Ocean  
341 temperatures play an important role in the spatial distribution of fish populations (Beentjes et  
342 al. 2002). Warmer than usual SST are often an indication of increased stratification of the water  
343 column where a layer of warmer water sits on top of cooler water. This disrupts the benthic-  
344 pelagic coupling, i.e. mixing processes that regulate nutrient flow between benthos and surface  
345 waters (Jones et al. 2014). Land run-off has been identified as a major source of nutrients for the

346 South Otago continental shelf, which results in higher near-surface nutrient concentrations  
347 (Hawke 1989), so that vertical mixing is likely of crucial importance for benthic productivity and  
348 subsequent prey abundance in the penguins' home ranges. Penguin foraging conditions are  
349 likely compromised under stratified, warm-water conditions.

350 The three major die-offs of adult penguins (seasons 1989-90, 2001-02, and 2012-13) all  
351 occurred in years with higher than normal SST suggesting that stratification might have more  
352 severe impacts than can be explained by the disruption of nutrient fluxes alone.

#### 353 **4.2 SST and relevance of die-off events**

354 Die-off events do not seem to be related to prey availability. Body condition of adult penguins  
355 did not indicate malnutrition (Gill and Darby 1993). The cause of mortality could not be  
356 identified although necropsies after the 2012 die-off indicated it to be toxin related (Department  
357 of Conservation, unpublished data). Harmful algal blooms (HAB) were suspected (Gill and Darby  
358 1993), yet water samples taken along a transect through the penguin's known foraging ranges  
359 found no evidence for the presence of harmful algae (unpubl. data). Moreover, it seems unlikely  
360 that a HAB would selectively affect only one seabird species; no other unexplained seabird  
361 deaths occurred during either of the die-offs. That only bottom foraging YEPs were affected  
362 suggests that the distribution of a toxin was probably limited to the near-seafloor region.

363 Stratification and the disruption of vertical mixing potentially would contribute to a  
364 concentration of toxic components at the sea floor. While the origin or exact nature of the toxin  
365 is unclear, it could be related to technical malfunctions that occurred at the time at Dunedin's  
366 sewage treatment plant, which discharges at the seafloor about 1.5 km from the shore and ca. 5  
367 km upstream from Boulder Beach.

368 Although the cause of die-off events remains a matter of speculation, their relevance for  
369 population trends is closely tied to prevalent environmental conditions following these events.  
370 The 1989 die-off, which removed about 50% of penguins from the breeding population (Efford  
371 et al. 1996) was followed by a six year period of population recovery, likely aided by cooler than  
372 normal SST (Fig. 4). The next die-off event occurred at Boulder Beach in 2001 (Alvin Setiawan,

373 pers. comm.) and reduced the local population by nearly 40%. Following this event, the  
374 population showed no sign of recovery during a prolonged period of warmer-than-normal SST  
375 that began in 1998 and prevails until today. The associated reduced adult survival explains the  
376 lack of recovery in the penguin population (Fig 4). Consequently, the 2012 die-off had a  
377 cumulative effect, further reducing the population to its lowest level on record.

378 With projected SST increases over the next decades it seems doubtful that marine conditions  
379 supporting the recovery of YEPs will occur in the future. Hence, future die-off events will be  
380 increasingly critical for penguin numbers. However, sea surface temperatures only explained  
381 about one third of the variation in survival rates. This means that other factors also play  
382 important roles for population dynamics.

### 383 **4.3 Other climate factors**

384 Daily minimum air temperature (Table 3b) is a proxy for prevailing temperature regimes, where  
385 a higher average minimum temperature indicates warmer years. Air temperature could simply  
386 be a covariate of SST and affect penguin survival through the mechanisms suggested above. In  
387 addition, air temperatures recorded during the moult (March-May) negatively affected adult  
388 survival probably as a result of hyperthermia (Table 3b). Little penguins in Australia suffer  
389 increased adult mortality when exposed to higher temperatures when moulting (Ganendran et  
390 al. 2015).

391 Frequency of days with strong winds had a positive influence on fledgling survival (Table 3a).  
392 Wind aids oceanic mixing processes and thereby can become a driver for foraging success in  
393 penguins (Dehnhard et al. 2013). Wind generally acts as an antagonist to SST-related  
394 stratification effects, creating enhanced foraging conditions for penguins thereby increasing the  
395 survival chances of inexperienced fledglings.

### 396 **4.4 Non-climate factors**

397 In this study we were able to use comprehensive climate data to test the influence of a wide  
398 range of factors on the population developments of Yellow-eyed penguins from Boulder Beach,



399 and show that climate change is likely to have a detrimental impact on the YEP population.

400 However, there are many other environmental parameters known to have a substantial  
401 influence on reproductive success and survival in YEPs, but which could not be included in our  
402 models due to the lack of adequate or inconsistent data. These factors are likely responsible for  
403 the remaining variation in survival rates.

#### 404 ***4.4.1 Fisheries interactions***

405 Potential impacts of incidental bycatch in gill net fisheries (Darby and Dawson 2000) and  
406 alteration of the penguins' benthic foraging habitat by bottom fishing activities (Ellenberg and  
407 Mattern 2012; Mattern et al. 2013) could not be quantified because data on gill net fisheries  
408 supplied by the Ministry of Primary Industries (NZ Ministry Of Primary Industries, Official  
409 Information Act Request OIA12-397) proved to be spatially coarse and temporally limited, with  
410 approximate locations of gill net fishing events specified only from 2006 onwards. Provided data  
411 on bottom fishing effort only covered the years 2000-2012 and originated from vessels  
412 operating outside the penguins' ranges (OIA12-460).

413 The impact of single fisheries interactions might have a much greater effect on penguin numbers  
414 than annual fishing statistics would suggest. There are reports of multiple YEP killed in a single  
415 gill net haul (Ellenberg and Mattern 2012) and reported bycatch incidents in gill net fisheries  
416 have been as high as 12 cases per year, many of which affected YEPs from the Otago Peninsula  
417 (Darby and Dawson 2000). The lack of independent observer coverage on gill nets operating  
418 within the YEP foraging grounds prevents reliable quantification of bycatch mortality. Yet it  
419 stands to reason that incidental fisheries mortality is an important factor affecting survival rates  
420 and, hence, population trends.

421 Impacts of bottom fishing activities on YEP survival are even more difficult to quantify. Bottom  
422 trawling and dredge fisheries can substantially alter the benthic environment, reducing  
423 biodiversity, and prey abundance and quality for YEPs. Low quality prey were brought ashore by  
424 YEPs on Stewart Island, which had home ranges that apparently avoided the vast areas of  
425 potential habitat subject to intensive oyster dredging (Browne et al. 2011; Ellenberg and

426 Mattern 2012). On the Otago Peninsula, some penguins forage along straight-line paths  
427 following bottom trawl scrape marks, searching for scavenging prey that appears to be  
428 inadequate food for young chicks (Mattern et al. 2013).

#### 429 **4.4.2 Disease outbreaks**

430 In the past decade several breeding seasons saw the occurrence of diphtheritic stomatitis, a  
431 secondary infection negatively affecting chick survival (Houston 2005). We could not test the  
432 effects of such disease outbreaks on population trends, because the YEP database does not  
433 facilitate quantitative storage of disease-related data. Diphtheritic stomatitis only affects chicks  
434 which generally survive when older than 2 weeks. So the disease is unlikely to have a lasting  
435 effect on population trends as it does not affect adults which are critical for the maintenance of a  
436 stable population (Benton and Grant 1999). Although YEPs are subject to exposure to avian  
437 malaria parasites (Graczyk et al. 1995), observed infections are too low to suggest that avian  
438 malaria represents a significant problem for the species (Sturrock and Tompkins 2007).

#### 439 **4.4.3 Predators**

440 Introduced terrestrial predators are one of the biggest challenges for native wildlife in New  
441 Zealand (Wilson 2004). Mustelids, dogs, and to a lesser extent cats and rats can have a  
442 significant impact on YEP (e.g. Alterio et al. 1998; Ratz and Murphy 1999), but it is very difficult  
443 to quantify these effects because direct evidence of predation is sparse (e.g. King et al. 2012).

444 Predation by the native NZ sea lion (*Phocarctos hookeri*) has to date been limited to two female  
445 sea lions that were active between 1997 and 2005 (Lalas et al. 2007) that have since died (Jim  
446 Fyfe, pers. com.). More recently, a number of YEPs have been reported with injuries that were  
447 speculated to have been inflicted by barracouta (*Thyrssites atun*). Considering that barracouta are  
448 smaller than adult YEPs (mean body lengths – barracouta: 55 cm, Fishbase.org 2016; YEPs: 65  
449 cm, Seddon et al. 2013a) such injuries are at best an accidental consequence of penguins and fish  
450 targeting the same prey patch. Some external injuries might be the result of interactions with  
451 humans; in Australia, Little penguins (*Eudyptula minor*) have been injured and killed by water

452 craft such as jet skis (Cannell et al. 2016), a recreational activity that has also been observed in  
453 the penguin landing zone at Boulder Beach (pers. obs).

#### 454 **4.4.4 Human disturbance**

455 The significance of human impacts in the form of deforestation of breeding habitat, capture by  
456 collectors, eggng, and shooting of adults on the YEP population was highlighted early by  
457 Richdale (1952). While these impacts are no longer an issue, unregulated tourism has become  
458 the main type of human disturbance at some Yellow-eyed penguin colonies and is reflected in  
459 reduced breeding performance and a steady decline of local penguin numbers (e.g. Ellenberg et  
460 al. 2009; Ellenberg et al. 2007; McClung et al. 2004).

#### 461 **4.5 Conservation implications**

462 Stochastic simulations of future population trends for Yellow-eyed penguins at Boulder Beach,  
463 which are likely representative of the entire Otago Peninsula, suggest that the population will  
464 continue to decline (Fig 5). Global ocean temperatures are rising (Stocker 2014); projections for  
465 the Tasman region until 2060 predict an increase in SST of up to 2°C (Oliver et al. 2014), hence  
466 future climatic conditions will not be favorable for a recovery of the YEP population. However,  
467 climate change-related pressure on YEP can likely be offset through control of the other more  
468 manageable factors negatively affecting population trends. This has already been demonstrated:  
469 positive YEP population growth during the 1940s, at a time when SST was strongly increasing in  
470 the Pacific to levels comparable to those recorded in the 1990s (Guan and Nigam 2008), was  
471 attributed to a reduction in human disturbances such as conversion of breeding habitat to farm  
472 land, establishment of road networks, road traffic and random acts of violence (Richdale 1957).  
473 During World War II, when resources were directed towards the war effort ‘man’s destructive  
474 agencies were practically negligible’ (Richdale 1957, p157).

475 While climate change is a global phenomenon that is both inevitable and quantifiable, it is  
476 important to bear in mind its impact on species population trends relative to other more  
477 regional factors, such as, in the case of penguins, fisheries, pollution, habitat destruction,  
478 introduced terrestrial predators, and human disturbance (Trathan et al. 2015). Managing local

479 and regional factors can mitigate the increasing pressure that climate change will impose on  
480 populations of some vulnerable species.

481 The virtual absence of quantifiable data to examine the effects of non-climatic factors makes it  
482 difficult to provide fact-based management recommendations and puts a potentially  
483 overbearing emphasis on climate change. However, these principally anthropogenic factors  
484 likely also explain significant portions of the variation in survival rates, so that the focus should  
485 be on improving our understanding and management of these impacts to enhance this species'  
486 resilience to climate change.

## 487 **5. Acknowledgements**

488 We would like to extend our gratitude to the many field workers and students involved in  
489 penguin monitoring that contributed data to the YEPDB.

## 490 **6. References**

491 Alterio, N., Moller, H., Ratz, H., 1998. Movements and habitat use of feral house cats *Felis catus*,  
492 stoats *Mustela erminea* and ferrets *Mustela furo*, in grassland surrounding yellow-eyed  
493 penguin *Megadyptes antipodes* breeding areas in spring. *Biological Conservation* 83, 187-  
494 194.

495 Beentjes, M., Bull, B., Hurst, R., Bagley, N., 2002. Demersal fish assemblages along the continental  
496 shelf and upper slope of the east coast of the South Island, New Zealand. *New Zealand*  
497 *Journal of Marine and Freshwater Research* 36, 197-223.

498 Beentjes, M., Renwick, J., 2001. The relationship between red cod, *Pseudophycis bachus*,  
499 recruitment and environmental variables in New Zealand. *Environmental Biology of*  
500 *Fishes* 61, 315-328.

501 Benton, T.G., Grant, A., 1999. Elasticity analysis as an important tool in evolutionary and  
502 population ecology. *Trends in Ecology & Evolution* 14, 467-471.

- 503 BirdLife International, 2012. *Medadypetes antipodes*, In The IUCN Red List of Threatened Species  
504 2012. p. e.T22697800A40186242.
- 505 Boessenkool, S., Austin, J.J., Worthy, T.H., Scofield, P., Cooper, A., Seddon, P.J., Waters, J.M., 2009a.  
506 Relict or colonizer? Extinction and range expansion of penguins in southern New Zealand.
- 507 Boessenkool, S., Star, B., Waters, J.M., Seddon, P.J., 2009b. Multilocus assignment analyses reveal  
508 multiple units and rare migration events in the recently expanded yellow-eyed penguin  
509 (*Megadyptes antipodes*). *Molecular ecology* 18, 2390-2400.
- 510 Browne, T., Lalas, C., Mattern, T., Van Heezik, Y., 2011. Chick starvation in yellow-eyed penguins:  
511 Evidence for poor diet quality and selective provisioning of chicks from conventional diet  
512 analysis and stable isotopes. *Austral Ecology* 36, 99-108.
- 513 Cannell, B.L., Campbell, K., Fitzgerald, L., Lewis, J.A., Baran, I.J., Stephens, N.S., 2016.  
514 Anthropogenic trauma is the most prevalent cause of mortality in Little Penguins,  
515 *Eudyptula minor*, in Perth, Western Australia. *Emu* 116, 52-61.
- 516 Croxall, J., 1982. Energy costs of incubation and moult in petrels and penguins. *The Journal of*  
517 *Animal Ecology*, 177-194.
- 518 Dann, P., 1991. Distribution, Population Trends and Factors Influencing the Population Size of  
519 Little Penguins *Eudyptula minor* on Phillip Island, Victoria. *Emu* 91, 263-272.
- 520 Dann, P., 2013. Little Penguin (*Eudyptula minor*), In *Penguins: Natural History and Conservation*.  
521 eds P. Garcia Borboroglu, P.D. Boersma, pp. 304-319. University of Washington Press,  
522 Seattle & London.
- 523 Darby, J., 1985a. The great hoiho count. *Forest and Bird*, 16-18.
- 524 Darby, J., 1985b. The great yellow-eyed penguin count. *Forest & Bird* 16, 16-18.
- 525 Darby, J., Seddon, P., 1990. Breeding biology of Yellow-eyed Penguins (*Megadyptes antipodes*), In  
526 *Penguin Biology*. eds L. Davis, J. Darby, pp. 45-62. Academic Press, San Diego.

- 527 Darby, J.T., Dawson, S.M., 2000. Bycatch of yellow-eyed penguins (*Megadyptes antipodes*) in  
528 gillnets in New Zealand waters 1979–1997. *Biological Conservation* 93, 327-332.
- 529 Daunt, F., Wanless, S., Harris, M., Money, L., Monaghan, P., 2007. Older and wiser: improvements  
530 in breeding success are linked to better foraging performance in European shags.  
531 *Functional Ecology* 21, 561-567.
- 532 Dehnhard, N., Ludynia, K., Poisbleau, M., Demongin, L., Quillfeldt, P., 2013. Good Days, Bad Days:  
533 Wind as a Driver of Foraging Success in a Flightless Seabird, the Southern Rockhopper  
534 Penguin. *PloS one* 8, e79487.
- 535 Efford, M., Spencer, N., Darby, J., 1994. A relational database for Yellow-eyed penguin banding  
536 and breeding records. Landcare Research, Dunedin, New Zealand, unpublished report.
- 537 Efford, M., Spencer, N., Darby, J., 1996. Population studies of Yellow-eyed penguins - 1994-94  
538 progress report. Department of Conservation, Wellington.
- 539 Ellenberg, U., Mattern, T., 2012. Yellow-eyed penguin - review of population information, In  
540 Conservation Services Programme Reports. p. 144. Department of Conservation,  
541 Wellington, New Zealand.
- 542 Ellenberg, U., Mattern, T., Seddon, P.J., 2009. Habituation potential of yellow-eyed penguins  
543 depends on sex, character and previous experience with humans. *Animal Behaviour* 77,  
544 289-296.
- 545 Ellenberg, U., Setiawan, A.N., Cree, A., Houston, D.M., Seddon, P.J., 2007. Elevated hormonal stress  
546 response and reduced reproductive output in Yellow-eyed penguins exposed to  
547 unregulated tourism. *General and comparative endocrinology* 152, 54-63.
- 548 Fishbase.org, 2016. Thyrsites atun (Euphrasen, 1791) Snoek, In Fishbase.org.
- 549 Ganendran, L.B., Sidhu, L.A., Catchpole, E.A., Chambers, L.E., Dann, P., 2015. Effects of ambient air  
550 temperature, humidity and rainfall on annual survival of adult little penguins *Eudyptula*  
551 minor in southeastern Australia. *International Journal of Biometeorology*, 1-9.

- 552 Garcia Borboroglu, P., Boersma, P., 2013. Penguins: Natural History and Conservation. University  
553 of Washington Press.
- 554 Gill, J., Darby, J., 1993. Deaths in yellow-eyed penguins (*Megadyptes antipodes*) on the Otago  
555 Peninsula during the summer of 1990. *New Zealand Veterinary Journal* 41, 39-42.
- 556 Graczyk, T.K., Cranfield, M.R., Brossy, J.J., Cockrem, J., Jouventin, P., Seddon, P., 1995. Detection of  
557 avian malaria infections in wild and captive penguins. *JOURNAL-HELMINTHOLOGICAL*  
558 *SOCIETY WASHINGTON* 62, 135-142.
- 559 Grémillet, D., Boulinier, T., 2009. Spatial ecology and conservation of seabirds facing global  
560 climate change: a review. *Marine Ecology Progress Series* 391, 121-137.
- 561 Grosbois, V., Gimenez, O., Gaillard, J.M., Pradel, R., Barbraud, C., Clobert, J., Møller, A.,  
562 Weimerskirch, H., 2008. Assessing the impact of climate variation on survival in vertebrate  
563 populations. *Biological Reviews* 83, 357-399.
- 564 Guan, B., Nigam, S., 2008. Pacific Sea Surface Temperatures in the Twentieth Century: An  
565 Evolution-Centric Analysis of Variability and Trend. *Journal of Climate* 21, 2790-2809.
- 566 Hawke, D., 1989. Hydrology and near-surface nutrient distribution along the South Otago  
567 continental shelf, New Zealand, in summer and winter 1986. *New Zealand Journal of*  
568 *Marine and Freshwater Research* 23, 411-420.
- 569 Houston, D.M., 2005. Diphtheritic stomatitis in yellow-eyed penguins, In *Oamaru Penguin*  
570 *Symposium 2005*. ed. A. Hocken, p. 267. *New Zealand Journal of Zoology*, Oamaru, New  
571 Zealand.
- 572 Jones, D.O.B., Yool, A., Wei, C.-L., Henson, S.A., Ruhl, H.A., Watson, R.A., Gehlen, M., 2014. Global  
573 reductions in seafloor biomass in response to climate change. *Global Change Biology* 20,  
574 1861-1872.

- 575 King, S., Harper, G., Wright, J., McInnes, J., van der Lubbe, J., Dobbins, M., Murray, S., 2012. Site-  
576 specific reproductive failure and decline of a population of the Endangered yellow-eyed  
577 penguin: a case for foraging habitat quality. *Marine Ecology Progress Series* 467, 233.
- 578 Lalas, C., Ratz, H., McEwan, K., McConkey, S.D., 2007. Predation by New Zealand sea lions  
579 (*Phocarctos hookeri*) as a threat to the viability of yellow-eyed penguins (*Megadyptes*  
580 *antipodes*) at Otago Peninsula, New Zealand. *Biological Conservation* 135, 235-246.
- 581 Limmer, B., Becker, P.H., 2009. Improvement in chick provisioning with parental experience in a  
582 seabird. *Animal Behaviour* 77, 1095-1101.
- 583 Mattern, T., Ellenberg, U., Houston, D.M., Davis, L.S., 2007. Consistent foraging routes and benthic  
584 foraging behaviour in yellow-eyed penguins. *Marine Ecology Progress Series* 343, 295-  
585 306.
- 586 Mattern, T., Ellenberg, U., Houston, D.M., Lamare, M., Davis, L.S., van Heezik, Y., Seddon, P.J., 2013.  
587 Straight line foraging in yellow-eyed penguins: new insights into cascading fisheries  
588 effects and orientation capabilities of marine predators. *PloS one* 8, e84381.
- 589 McClung, M.R., Seddon, P.J., Massaro, M., Setiawan, A., 2004. Nature-based tourism impacts on  
590 yellow-eyed penguins *Megadyptes antipodes*: does unregulated visitor access affect  
591 fledging weight and juvenile survival? *Biological Conservation* 119, 279-285.
- 592 Moore, P., 1999. Foraging range of the Yellow-eyed Penguin *Megadyptes antipodes*. *Marine*  
593 *Ornithology* 27, 49-58.
- 594 Moore, P., Wakelin, M., 1997. Diet of the yellow-eyed penguin *Megadyptes antipodes*, South  
595 Island, New Zealand, 1991-1993. *Marine Ornithology* 25, 17-29.
- 596 Moore, P.J., 2001. Historical records of yellow-eyed penguin (*Megadyptes antipodes*) in southern  
597 New Zealand. *Notornis* 48, 145-156.



- 598 Nisbet, I.C., Dann, P., 2009. Reproductive performance of little penguins *Eudyptula minor* in  
599 relation to year, age, pair-bond duration, breeding date and individual quality. *Journal of*  
600 *Avian Biology* 40, 296-308.
- 601 Oliver, E., Wotherspoon, S., Chamberlain, M., Holbrook, N., 2014. Projected Tasman Sea Extremes  
602 in Sea Surface Temperature through the Twenty-First Century. *Journal of Climate* 27,  
603 1980-1998.
- 604 Opdam, P., Wascher, D., 2004. Climate change meets habitat fragmentation: linking landscape  
605 and biogeographical scale levels in research and conservation. *Biological Conservation*  
606 117, 285-297.
- 607 Parmesan, C., 2006. Ecological and evolutionary responses to recent climate change. *Annual*  
608 *Review of Ecology, Evolution, and Systematics*, 637-669.
- 609 Parmesan, C., Yohe, G., 2003. A globally coherent fingerprint of climate change impacts across  
610 natural systems. *Nature* 421, 37-42.
- 611 Peacock, L., Paulin, M., Darby, J.T., 2000. Investigations into the climate influence on population  
612 dynamics of yellow-eyed penguins *Megadyptes antipodes*. *New Zealand Journal of Zoology*  
613 27, 317-325.
- 614 Perriman, L., Houston, D., Steen, H., Johannesen, E., 2000. Climate fluctuation effects on breeding  
615 of blue penguins (*Eudyptula minor*). *New Zealand Journal of Zoology* 27, 261-267.
- 616 Ratz, H., Murphy, B., 1999. Effects of habitat and introduced mammalian predators on the  
617 breeding success of Yellow-eyed Penguins *Megadyptes antipodes*, South Island, New  
618 Zealand. *Pacific Conservation Biology* 5, 16-27.
- 619 Richdale, L.E., 1949. A study of a group of penguins of known age. Otago Daily Times and Witness  
620 Newspapers Company.
- 621 Richdale, L.E., 1951. Sexual behavior in penguins.
- 622 Richdale, L.E., 1957. A population study of penguins. Clarendon Press.

- 623 Robertson, H.A., Dowding, J.E., Elliott, G.P., Hitchmough, R.A., Miskelly, C.M., O'Donnell, C.F.J.,  
624 Powlesland, R.G., Sagar, P.M., Scofield, P.R., Taylor, G.A., 2013. Conservation status of New  
625 Zealand birds, 2012. New Zealand Threat Classification Series 4. Department of  
626 Conservation, Wellington, New Zealand, 22p.
- 627 Seddon, P., Ellenberg, U., van Heezik, Y., 2013a. Yellow-eyed penguin (*Megadyptes antipodes*), In  
628 Penguins: Natural History and Conservation. eds P. Garcia Borboroglu, P. Boersma, pp. 91-  
629 110. University of Washington Press, Seattle & London.
- 630 Seddon, P.J., Ellenberg, U., van Heezik, Y., 2013b. Yellow-Eyed Penguin (*Megadyptes antipodes*).  
631 Penguins: Natural History and Conservation, 97-100.
- 632 Sekercioglu, C.H., Schneider, S.H., Fay, J.P., Loarie, S.R., 2008. Climate change, elevational range  
633 shifts, and bird extinctions. *Conservation Biology* 22, 140-150.
- 634 Sexton, J.P., McIntyre, P.J., Angert, A.L., Rice, K.J., 2009. Evolution and ecology of species range  
635 limits.
- 636 Sitas, N., Baillie, J.E.M., Isaac, N.J.B., 2009. What are we saving? Developing a standardized  
637 approach for conservation action. *Animal Conservation* 12, 231-237.
- 638 Stocker, T.F., 2014. Climate change 2013: the physical science basis: Working Group I  
639 contribution to the Fifth assessment report of the Intergovernmental Panel on Climate  
640 Change. Cambridge University Press.
- 641 Sturrock, H.J.W., Tompkins, D.M., 2007. Avian malaria (*Plasmodium* spp) in yellow-eyed  
642 penguins: Investigating the cause of high seroprevalence but low observed infection. *New*  
643 *Zealand Veterinary Journal* 55, 158-160.
- 644 Takasuka, A., Oozeki, Y., Kubota, H., 2008. Multi-species regime shifts reflected in spawning  
645 temperature optima of small pelagic fish in the western North Pacific. *Marine Ecology*  
646 *Progress Series* 360, 211-217.

- 647 Tang, S., Chen, L., 2002. Density-dependent birth rate, birth pulses and their population dynamic  
648 consequences. *Journal of Mathematical Biology* 44, 185-199.
- 649 Tavecchia, G., Tenan, S., Pradel, R., Igual, J.M., Genovart, M., Oro, D., 2016. Climate-driven vital  
650 rates do not always mean climate-driven population. *Global Change Biology*, doi:  
651 10.1111/gcb.13330
- 652 Thomas, C.D., Cameron, A., Green, R.E., Bakkenes, M., Beaumont, L.J., Collingham, Y.C., Erasmus,  
653 B.F.N., de Siqueira, M.F., Grainger, A., Hannah, L., Hughes, L., Huntley, B., van Jaarsveld, A.S.,  
654 Midgley, G.F., Miles, L., Ortega-Huerta, M.A., Townsend Peterson, A., Phillips, O.L., Williams,  
655 S.E., 2004. Extinction risk from climate change. *Nature* 427, 145-148.
- 656 Thuiller, W., Lavorel, S., Araújo, M., 2005. Niche properties and geographical extent as predictors  
657 of species sensitivity to climate change. *Global Ecology and Biogeography* 14, 347-357.
- 658 Trathan, P.N., García-Borboroglu, P., Boersma, D., Bost, C.A., Crawford, R.J., Crossin, G.T.,  
659 Cuthbert, R.J., Dann, P., Davis, L.S., De La Puente, S., 2015. Pollution, habitat loss, fishing,  
660 and climate change as critical threats to penguins. *Conservation Biology* 29, 31-41.
- 661 van Heezik, Y., 1990. Seasonal, geographical, and age-related variations in the diet of the yellow-  
662 eyed penguin (*Megadyptes antipodes*). *New Zealand Journal of Zoology* 17, 201-212.
- 663 van Heezik, Y., Davis, L., 1990. Effects of food variability on growth rates, fledging sizes and  
664 reproductive success in the Yellow-eyed Penguin *Megadyptes antipodes*. *Ibis* 132, 354-365.
- 665 Whittington, P.A., Randall, R.M., Crawford, R.J.M., Wolfaardt, A.C., Klages, N.T.W., Randall, B.M.,  
666 Bartlett, P.A., Chesselet, Y.J., Jones, R., 2005. Patterns of immigration to and emigration  
667 from breeding colonies by African penguins. *African Journal of Marine Science* 27, 205-  
668 213.
- 669 Wilson, K.-J., 2004. Flight of the Huia: Ecology and conservation of New Zealand's frogs, reptiles,  
670 birds and mammals. Canterbury University Press Christchurch.

671 Zimmer, I., Ropert-Coudert, Y., Kato, A., Ancel, A., Chiaradia, A., 2011. Does Foraging Performance  
672 Change with Age in Female Little Penguins (*Eudyptula minor*)? PloS one 6, e16098.

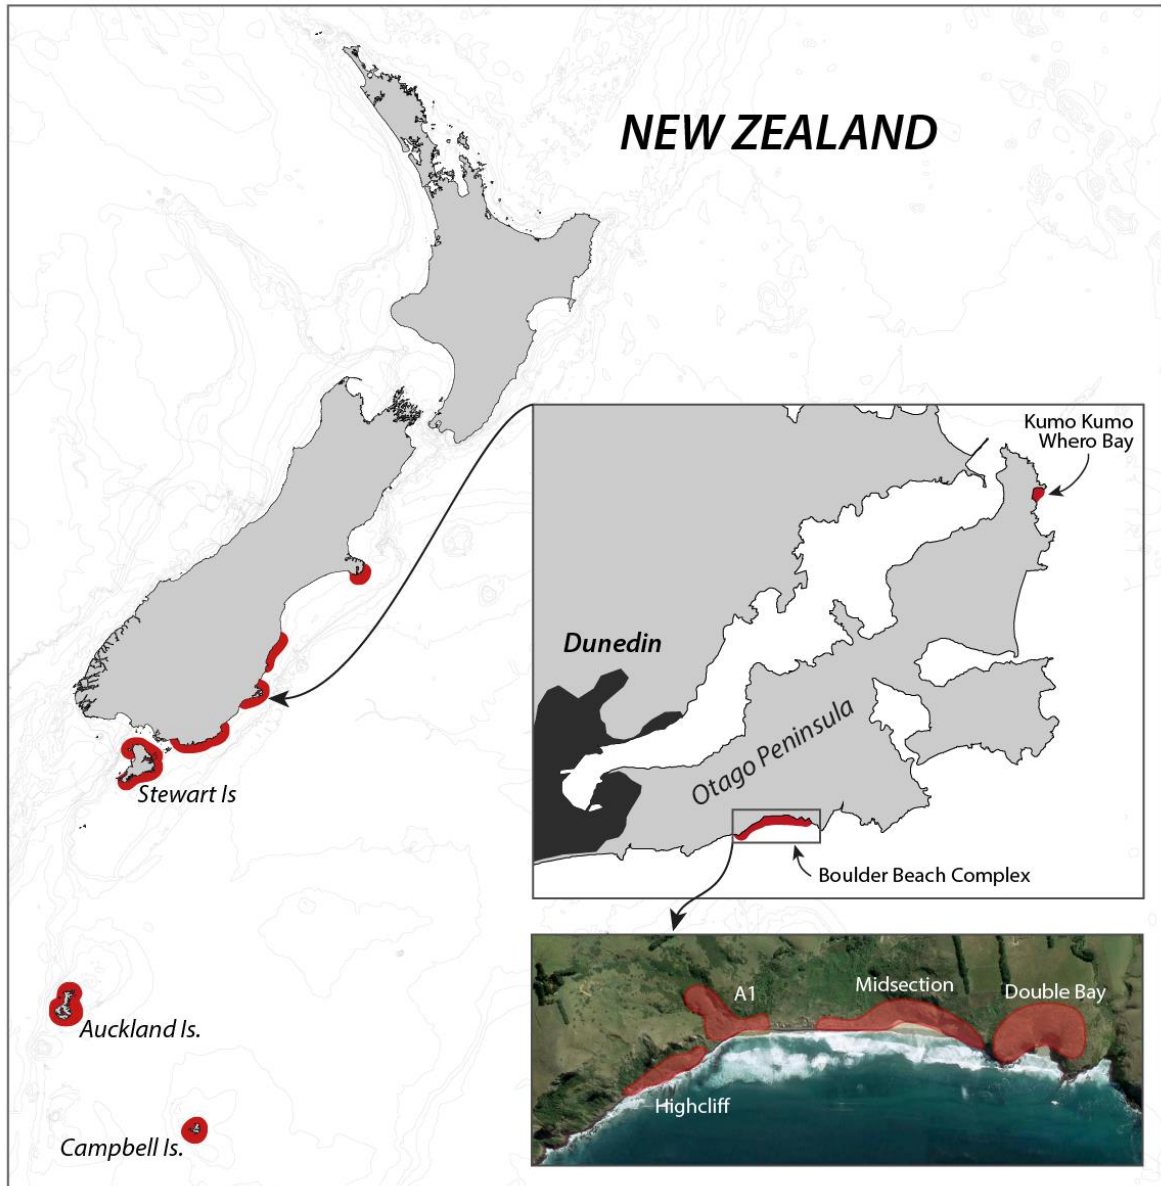

673

674 **Figure 1.** Overview of the breeding range of Yellow-eyed penguins, detail of the Otago Peninsula  
675 with and aerial view of the Boulder Beach Complex (henceforth Boulder Beach) with outlines  
676 indicating the locations of the four main monitoring plots

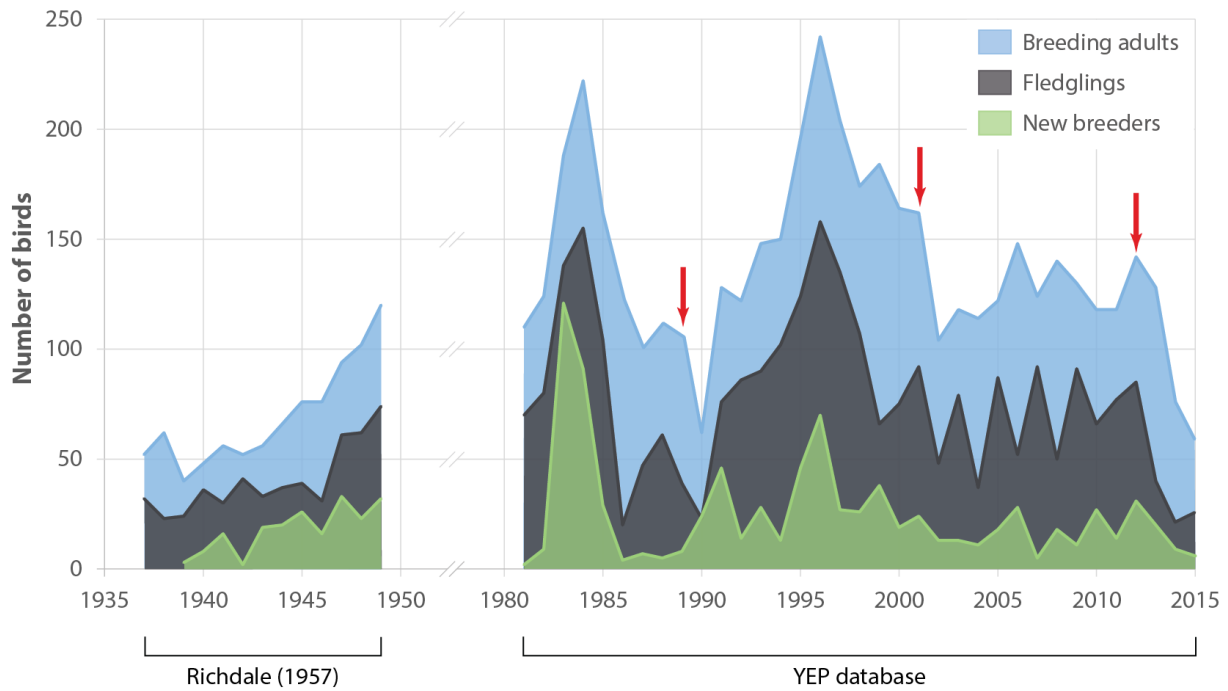

677

678 **Figure 2.** Observed penguin numbers at Kumo Kumo Whero 1937-1948 (from data published in  
679 Richdale 1957, see Methods for details) and at the Boulder Beach complex 1982-2015 as  
680 extracted from the Yellow-eyed penguin database. 'New breeders' represents the portion of all  
681 'breeding adults' that were recorded as breeders for the first time. Red arrows indicate years  
682 with observed die-off events affecting adult breeders. Note that as some sections of the Boulder  
683 Beach complex were not monitored in all years, data for the years 1986-1989 were adjusted by  
684 adding the mean proportion these areas contributed to the total count in all other years.

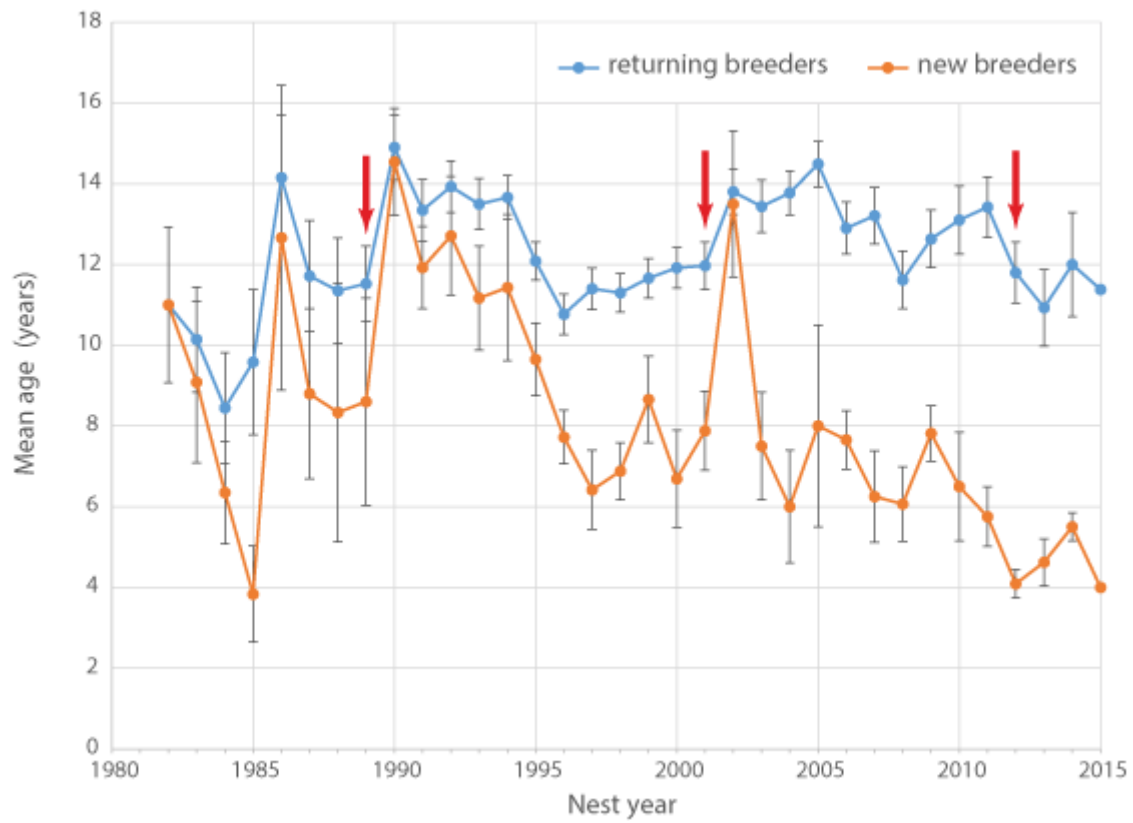

685

686 **Figure 3.** Average age of breeding Yellow-eyed penguins active at Boulder Beach between 1982

687 and 2015. Red arrows indicate years with observed die-off events affecting adult breeders.

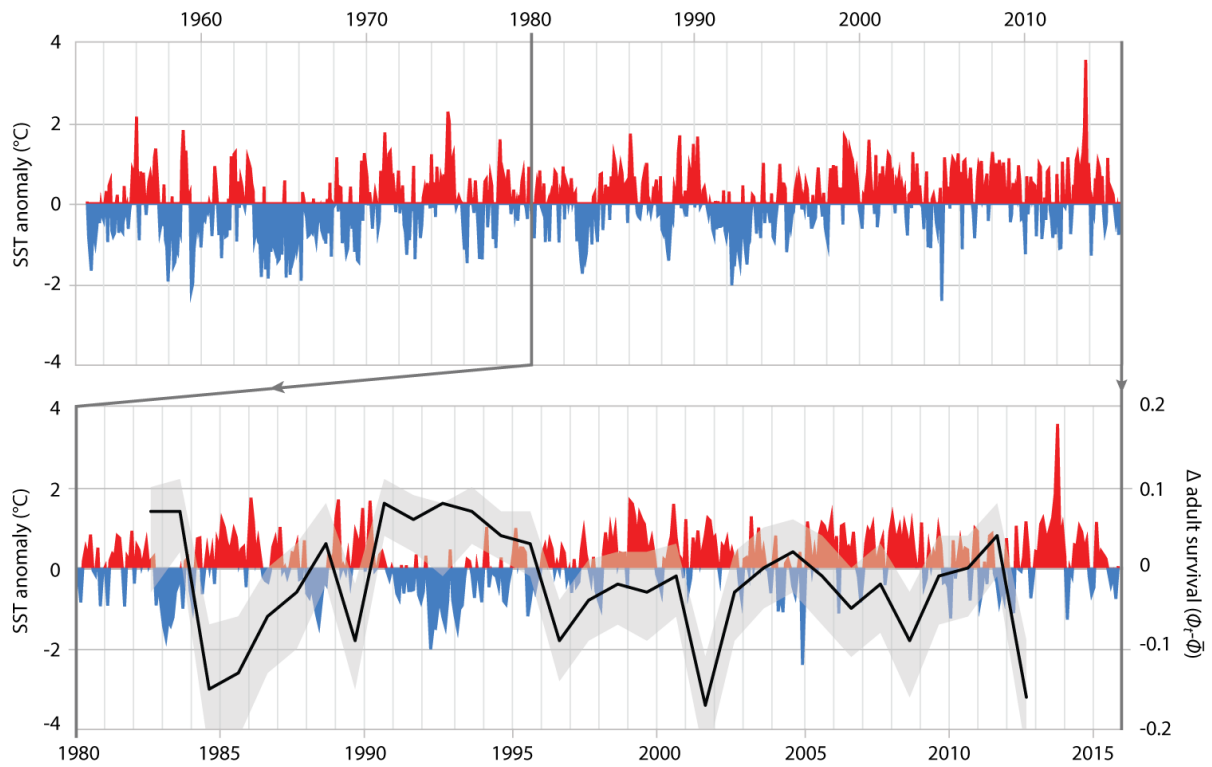

688

689 **Figure 4.** Top graph: Local Sea Surface Temperature anomalies recorded at Portobello Marine  
690 Lab, Otago Peninsula, between 1953 and 2016. Bottom graph: detail of SST anomalies 1980-  
691 2016 and associated deviance (black line: mean; grey area: 95% credible interval) in survival of  
692 adult Yellow-eyed penguins as determined from a MR recapture model.



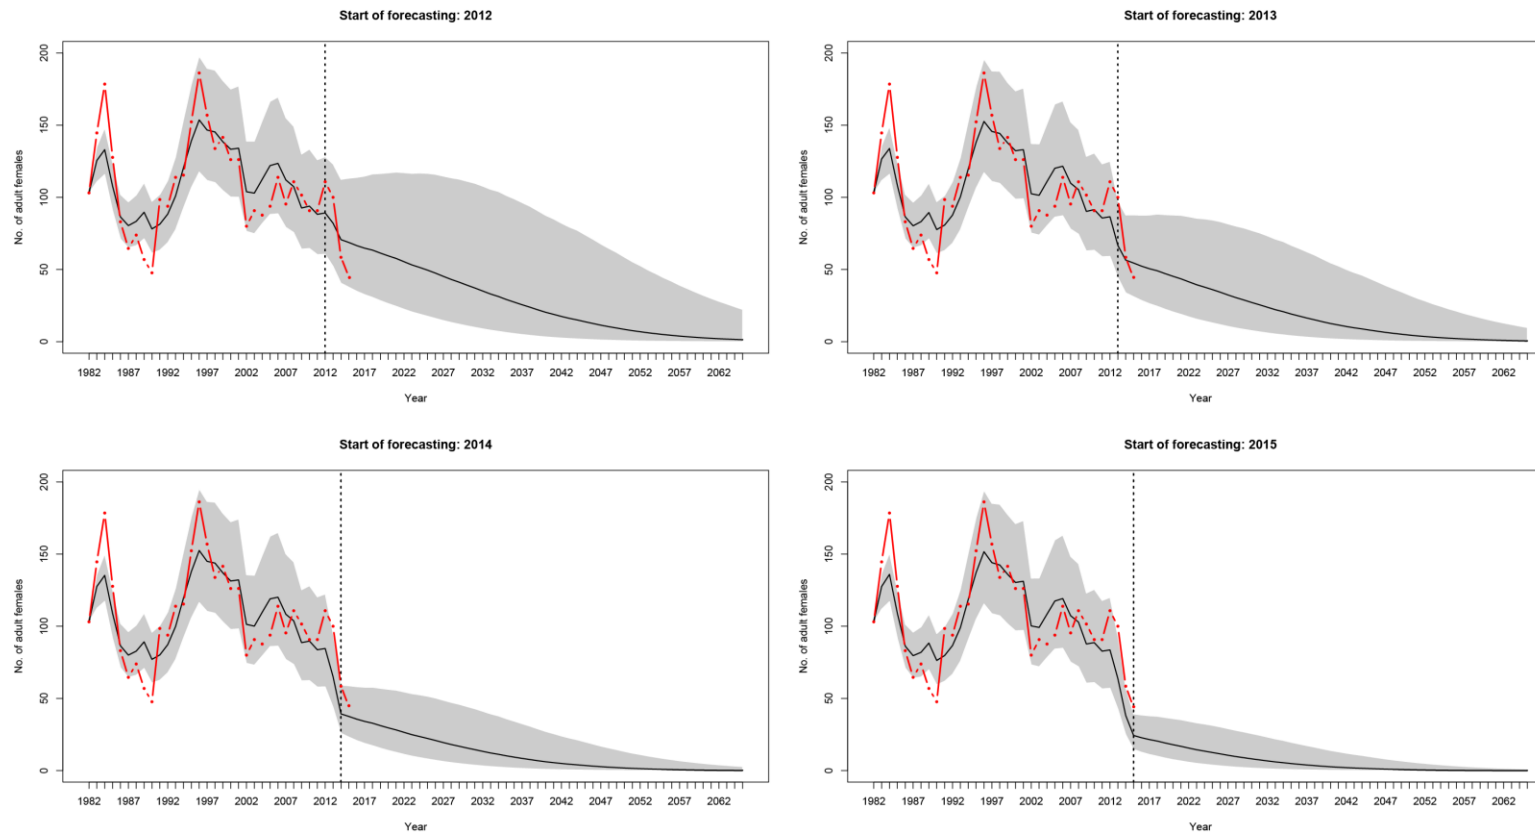

693

694 **Figure 5.** Population projections for Yellow-eyed penguins at Boulder Beach, Otago Peninsula. The graphs show the observed (red line) and estimated  
 695 (black line) number of female penguins, and associated 95% credible interval (grey area), as derived from the population model. The dashed vertical  
 696 line indicates the last year used to parameterise the MR model and the starting year of the simulation. It is important to note that after 2012 survival  
 697 rate estimates get increasingly unreliable because these are based on data about individual absence from breeding rather than from reported  
 698 mortalities (see 'Methods').

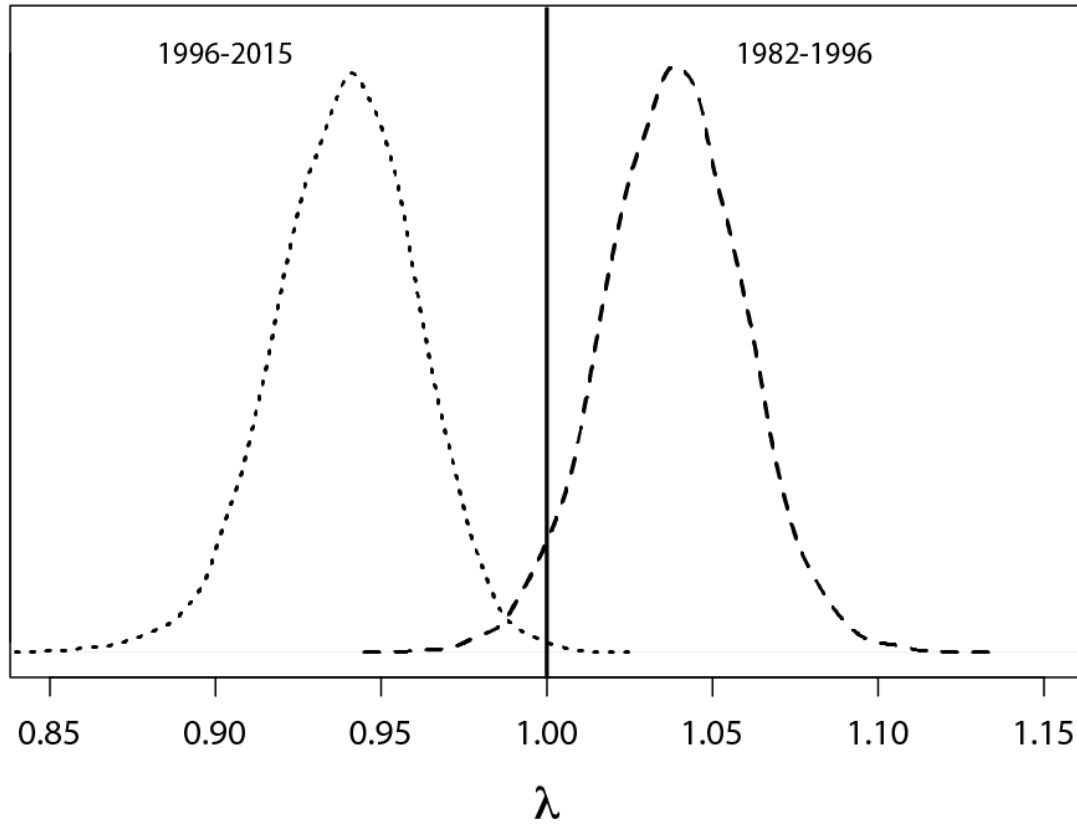

699

700 **Figure 6.** Probability density functions for deterministic annual population growth rates derived  
701 from survival rates that were rescaled for periods of cooler (1982-1996) and warmer  
702 (1996-2014) than average sea surface temperatures.

703 **Table 1.** Description of basic environmental parameters used for the development of a YEP  
704 population model.

| <b>Parameter</b>                                                | <b>shorthand</b>   | <b>Station</b>                                                          |
|-----------------------------------------------------------------|--------------------|-------------------------------------------------------------------------|
| Total Rainfall (mm)                                             | total_rainfall     | Southern Reservoir<br>(National Climate<br>database, CliFlo ID<br>5400) |
| Wet Days - Number Of<br>Days With 1mm Or More<br>Of Rain (days) | wet_days           | Southern Reservoir<br>(5400)                                            |
| Maximum 1-Day Rainfall -<br>9am To 9am Local Time               | max_1day_rain      | Dunedin, Musselburgh<br>(5402)                                          |
| Mean Air Temperature                                            | mean_air_temp      | Dunedin, Musselburgh<br>(5402)                                          |
| Mean Daily Minimum Air<br>Temperature                           | daily_min_temp     | Dunedin, Musselburgh<br>(5402)                                          |
| Days Of Wind Gusts $\geq 33$<br>Knots                           | days_wind_gusts_33 | Dunedin, Musselburgh<br>(5402)                                          |
| Sea Surface Temperature<br>anomaly                              | sst_anomaly        | Portobello Marine Lab,<br>University of Otago                           |

705 **Table 2.** Parameter estimates from the Bayesian mark-recapture model.  $\Phi$  indicates estimated  
706 survival rates,  $\sigma^2$  stands for the temporal variance of the stage-specific survival. Refer to ESM1  
707 for details.

| Parameters                                 | Median | Credible interval |       |
|--------------------------------------------|--------|-------------------|-------|
|                                            |        | 2.5%              | 95.5% |
| $\bar{\Phi}_{chicks}$                      | 0.124  | 0.077             | 0.189 |
| $\sigma^2_{chicks}$                        | 1.877  | 1.001             | 3.847 |
| $\sigma^2_{chicks}$ (on probability scale) | 0.021  | 0.009             | 0.065 |
| $\bar{\Phi}_{adults}$                      | 0.872  | 0.832             | 0.904 |
| $\sigma^2_{adults}$                        | 0.732  | 0.414             | 1.398 |
| $\sigma^2_{adults}$ (on probability scale) | 0.009  | 0.005             | 0.021 |

708 **Table 3a.** Estimated effect size for fledgling survival ( $\beta_{\text{fledlings}}$ ); PVE: percentage of variance in  
 709 fledgling survival explained by each covariate. Note, that negative values resulted from models  
 710 that estimated slightly higher (or less precise) variance in fledgling survival, as it would result  
 711 for the model without covariate. Except for covariate 2, 3, 4 and 15 all variables were  
 712 standardized before fitted to the MR model.

| ID | Covariate                  | Median | Credible interval |        | PVE  |
|----|----------------------------|--------|-------------------|--------|------|
|    |                            |        | 2.5%              | 95.5%  |      |
| 1  | days_wind_gusts_33_annual  | 0.850  | 0.377             | 1.329  | 33.2 |
| 2  | sst_anomaly_austral        | -1.967 | -3.148            | -0.964 | 33.2 |
| 3  | sst_anomaly_minus_1yr      | -1.516 | -2.649            | -0.392 | 24.8 |
| 4  | sst_anomaly_mar_june       | -0.970 | -1.845            | -0.111 | 17.4 |
| 5  | days_wind_gusts_33_mar_may | 0.696  | 0.198             | 1.241  | 16.5 |
| 6  | daily_min_temp_annual      | -0.644 | -1.190            | -0.143 | 15.4 |
| 7  | mean_air_temp_annual       | -0.590 | -1.167            | -0.102 | 12.4 |
| 8  | daily_min_temp_mar_may     | -0.303 | -0.829            | 0.204  | 0.7  |
| 9  | mean_air_temp_mar_may      | -0.304 | -0.850            | 0.190  | 0.2  |
| 10 | total_rainfall_may_may     | -0.254 | -0.823            | 0.296  | -2.3 |
| 11 | max_1day_rain_mar_may      | -0.250 | -0.835            | 0.318  | -3.3 |
| 12 | total_rainfall_annual      | -0.260 | -0.841            | 0.316  | -3.5 |
| 13 | max_1day_rain_annual       | -0.167 | -0.738            | 0.394  | -5.2 |
| 14 | wet_days_mar_may           | -0.141 | -0.702            | 0.431  | -5.6 |
| 15 | sst_anomaly_minus_2yr      | -0.217 | -1.451            | 1.045  | -5.6 |
| 16 | wet_days_annual            | 0.073  | -0.461            | 0.623  | -6.7 |

713 **Table 3b.** Estimated effect size for adult survival ( $\beta_{\text{adults}}$ ); PVE: percentage of variance in adult  
 714 survival explained by each covariate. Note, that negative values resulted from models that  
 715 estimated slightly higher (or less precise) variance in adult survival, as it would result for the  
 716 model without covariate. Except for covariate 1, 4, 5 and 14 all variables were standardized  
 717 before fitted to the MR model.

| ID | Covariate                  | Median | Credible interval |        | PVE  |
|----|----------------------------|--------|-------------------|--------|------|
|    |                            |        | 2.5%              | 95.5%  |      |
| 1  | sst_anomaly_austral        | -1.267 | -1.925            | -0.631 | 36.8 |
| 2  | mean_air_temp_annual       | -0.529 | -0.817            | -0.251 | 34.4 |
| 3  | daily_min_temp_annual      | -0.516 | -0.796            | -0.227 | 34.4 |
| 4  | sst_anomaly_mar_june       | -0.808 | -1.329            | -0.310 | 26.2 |
| 5  | sst_anomaly_minus_1yr      | -1.056 | -1.719            | -0.406 | 25.7 |
| 6  | days_wind_gusts_33_annual  | 0.377  | 0.075             | 0.690  | 16.5 |
| 7  | days_wind_gusts_33_mar_may | 0.350  | 0.052             | 0.666  | 12.8 |
| 8  | daily_min_temp_mar_may     | -0.214 | -0.537            | 0.088  | 2.0  |
| 9  | total_rainfall_may_may     | -0.146 | -0.461            | 0.193  | 1.0  |
| 10 | mean_air_temp_mar_may      | -0.181 | -0.513            | 0.140  | -0.3 |
| 11 | wet_days_mar_may           | -0.113 | -0.434            | 0.207  | -1.0 |
| 12 | max_1day_rain_mar_may      | -0.098 | -0.416            | 0.234  | -2.0 |
| 13 | max_1day_rain_annual       | 0.112  | -0.206            | 0.435  | -2.2 |
| 14 | sst_anomaly_minus_2yr      | -0.055 | -0.867            | 0.720  | -3.1 |
| 15 | wet_days_annual            | 0.064  | -0.275            | 0.393  | -3.8 |
| 16 | total_rainfall_annual      | 0.057  | -0.268            | 0.391  | -4.0 |

718 **Table 4.** Results of the Gibbs Variable Selection. 0 and 1 indicate whether each covariate is not  
 719 included or included in the model, respectively. The MR considers covariates  
 720 'sst\_anomaly\_austral' for fledgling (A) and adult survival (C), 'days\_wind\_gusts\_33\_annual' (B)  
 721 and 'mean\_air\_temp\_annual' (D). For a detailed description of the GVS refer to ESM4.

|                | Model configuration |   |                |   | p(M <sub>i</sub>  y) |
|----------------|---------------------|---|----------------|---|----------------------|
|                | Fledgling survival  |   | Adult survival |   |                      |
| M <sub>i</sub> | A                   | B | C              | D |                      |
| 1              | 1                   | 0 | 1              | 0 | 0.42                 |
| 2              | 0                   | 1 | 1              | 0 | 0.13                 |
| 3              | 1                   | 1 | 1              | 0 | 0.12                 |
| 4              | 1                   | 0 | 0              | 1 | 0.09                 |
| 5              | 0                   | 1 | 0              | 1 | 0.06                 |
| 6              | 0                   | 0 | 0              | 0 | 0.04                 |
| 7              | 1                   | 0 | 0              | 0 | 0.03                 |
| 8              | 0                   | 1 | 0              | 0 | 0.03                 |
| 9              | 1                   | 1 | 0              | 0 | 0.02                 |
| 10             | 0                   | 0 | 1              | 0 | 0.01                 |
| 11             | 0                   | 0 | 0              | 1 | 0.01                 |
| 12             | 1                   | 1 | 0              | 1 | 0.01                 |
| 13             | 0                   | 0 | 1              | 1 | 0                    |
| 14             | 1                   | 0 | 1              | 1 | 0                    |
| 15             | 0                   | 1 | 1              | 1 | 0                    |
| 16             | 1                   | 1 | 1              | 1 | 0                    |

722

## Electronic Supplementary Material 1.

### Estimation of demographic parameters

Using banding records of Yellow-eyed penguins, we developed a Bayesian mark-recapture (MR) model that was structured into 2 stages: (1) fledglings (age: 0 years) and (2) adults (1+ years). The MR model could not be sex-specific, because information on the gender was reported for only 58% of the individuals in the banding table. The only way to identify individuals were bands which are applied to chicks shortly prior to fledging. This means that our MR model did not consider chicks that died before they could be banded. Overall a total number of 2,967 individuals recorded over a 34-year period were used for analysis.

For the analysis we converted the data into two m-arrays for (1) individuals that were banded as fledglings and recaptured as adults, and (2) individuals that were banded as adults and recaptured as adults (ESM2). Both m-arrays are 2-dimensional matrices providing the number of recaptured individuals in any year (columns) following any release year (rows) (Burnham 1987). These m-arrays were analysed using the multinomial distribution, and parameters stage-specific survival  $\phi_{k,t}$ , with  $k$  = fledglings or adults in year  $t$ , and adult recapture (Kéry and Schaub 2012; Lebreton et al. 1992). We fixed the adult recapture probability to one, because the analysed data do not contain reliable recovery records, unless an individual had died or not returned to the breeding colony.

We allowed survival to be time-variant by modelling  $\phi_{k,t}$  on logit scale, which we assume to vary following a normal distribution with mean zero and stage-specific variance  $\sigma_k^2$ :

$$\text{logit}(\phi_{k,t}) = \mu_k + \varepsilon_{k,t} \quad [\text{E1.1}]$$

$$\varepsilon_{k,t} \sim \text{Normal}(0, \sigma_k^2) \quad [\text{E1.2}]$$

where  $\varepsilon_{k,t}$  denotes the temporal residuals for  $\mu_k$ . We supplied a uniform prior distribution on the interval  $[0, 1]$  for the mean survival on probability scale ( $\bar{\phi}_k$ ), which was linked to  $\mu_k$  using the link function  $\mu_k = \log(\bar{\phi}_k / (1 - \bar{\phi}_k))$ . We supplied uniform prior distributions for  $\sigma_k$  on the three



alternative intervals for [0, 2], [0, 5], and [0, 10], and found no prior sensitivity for estimated  $\sigma_k^2$  (ESM3).

Moreover, we extended the model described in eq. E1.1 to examine the effect of environmental covariates on  $\phi_{k,t}$ :

$$\text{logit}(\phi_{k,t}) = \mu_k + \beta_k * x_t + \epsilon_{k,t} \quad [\text{E1.3}]$$

where  $\beta_k$  denotes the stage-specific effect size fitted to the time-specific covariate  $x_t$ . Except for covariates reflecting SST anomaly we standardized  $((x_t - \bar{x}_t) / \text{sd}(x_t))$  all covariates before model fitting. To ensure that the data provide sufficient information to estimate each parameter, we assessed correlation matrices for each model parameterization (ESM4) (Gimenez et al. 2008), which was generally low (range [-0.14, 0.14]), although moderate cross correlation existed between the posterior estimates for mean survival and the effect size (range [-0.38, -0.21]) when we fitted models to covariates reflecting sst anomaly (ESM4). However, we found no sensitivity of estimates for  $\beta_k$  after varying the standard deviation of the normal prior supplied for  $\beta_k$  ( $N(0, 0.001)$  and  $N(0, 0.01)$ ) (ESM4). Additional prior configurations were imposed during the model selection procedure (see below).

For all models (eq. E1.1 and eq. E1.3) we found no indication for a lack-of-fit, based on Bayesian p-values (Gelman 2013; Gelman et al. 1996) that ranged between 0.28 and 0.48.

The model was analysed using JAGS (Plummer 2003). The burn-in was 2,000 iterations followed by 25,000 iterations, and posterior samples were drawn using a thinning interval of 3. We computed the potential scale reduction factor  $\hat{R}$  (Gelman and Rubin 1992) using the output of three MCMC chains and assumed convergence if  $\hat{R}$  was near to 1. For all estimated parameters  $\hat{R}$  was smaller than or equal to 1.01.

### **Model selection**

First, we fitted the model described in eq. 3 to each covariate separately and computed the percentage of temporal variance explained by each covariate (Grosbois et al. 2008) as:

$$((\sigma_k^2 - \sigma_{k,x^2}) / \sigma_k^2) * 100 \quad [\text{E1.4}]$$

where  $\sigma_k^2$  and  $\sigma_{k,x}^2$  are the temporal variance of the stage-specific survival from eq. E1.1 and eq. E1.3, respectively. We considered covariates as influential predictors if they explained at least 20% of  $\sigma_k^2$  (Grosbois et al. 2008). For each stage, the two strongest predictors were implemented into the MR model (i.e. eq. E1.3 plus an additional  $\beta_k$  for the second covariate in each stage). We assessed the posterior model probability for each combination of these four covariates using Gibbs Variable Selection (GVS) (Ntzoufras 2002; Tenan et al. 2014; Hooten and Hobbs 2015). Importantly, we repeated the analysis with various prior distributions and found that our results were not affected by the choice of priors required for GVS (ESM5).

## Population model

To model YEP population dynamics we developed a female-only model assuming a birth-pulse population (Tang and Chen 2002). Due to the lack of consistent data on gender in the database, we followed Richdale (1952) and assumed the sex ratio in YEP to be equal at hatching. As pointed out above, the MR model being based on banding information could not incorporate chick survival/fecundity. For the population model we accounted for this by determining the proportion of female chicks that hatched and remained within the population until fledging. We denoted this as

$$\bar{\gamma}_{chicks} = \bar{\rho} * \bar{\omega} * 0.5 \quad [E1.5]$$

where  $\bar{\rho}$  is the average proportion of breeding adults derived from the data of all banded adults (i.e. breeders vs. non-breeders with an age of 1+ years).  $\bar{\omega}$  denotes the average proportion of chicks per nest, which was obtained from annual nest monitoring at Boulder Beach. To ensure that only female individuals enter the model, we multiplied  $\bar{\omega}$  by 0.5 (i.e. based on a 1:1 sex ratio).

After leaving the nest in March, fledglings only have to survive 7 months (on average 212.971 days) until they can be recaptured again at the beginning of the following nesting season in November. Because of this we rescaled the fledgling survival from our MR model to reflect survival over 12-month time interval:

$$\Phi_{fledgling,t} = \phi_{fledglings,t}^{(1/(365/212.917))} \quad [E1.6]$$

Using this information we can now describe  $\gamma_{adult,t}$ , the proportion of adult YEPs within the population in year  $t$  as:

$$\gamma_{adult,t} = \phi_{adults,t} + \phi_{fledgling,t} * \bar{\gamma}_{chicks} \quad [E1.7]$$

where  $\phi_{adults,t}$  and  $\phi_{fledgling,t}$  are the only time-varying components, which were derived from posterior distributions for  $\phi_{fledglings,t}$  and  $\phi_{adults,t}$  from the model in eq. E1.3 using the covariates that were preserved during the model selection exercise.

For the study years 1982 to 2014 we projected  $n_{adult,t+1}$ , the number of adult YEPs in the year  $t+1$  as:

$$n_{adult,t+1} = n_{adult,t} * \gamma_{adult,t} \quad [E1.8]$$

where the initial adult population size at  $t=1$  was calculated as:

$$n_{adult,1} = n_{nest,1} / \bar{\rho} \quad [E1.9]$$

where  $n_{nest,1}$  is the observed number of nests in the first year (i.e. 1982) and  $\bar{\rho}$  is the proportion of breeders in the same year.

The average population size is determined by the survival parameters, the average proportion of breeders, and the proportion of fledglings per nest (i.e. a proxy for fecundity); the latter two contained in the variable  $\bar{\gamma}_{chicks}$ . The temporal fluctuation of  $n_{adult,t+1}$  only depends on the annual survival rates. Therefore, we visually assessed whether the use of the estimated temporal variance in survival is sufficient to predict the observed change in the adult population size, which was calculated through eq. 9 using the year-specific number of nest between 1982 and 2014.

### ***Effect of covariates on the population growth rate***

The linear function described in eq. E1.7 reflects the proportional change of adult individuals between years and thus the population growth rates from year  $t$  to  $t+1$ . Thus, replacing temporal

varying components  $\phi_{fledgling,t}$  and  $\phi_{adults,t}$  in eq. E1.7 with average survival rates can be used to approximate the deterministic population growth rate  $\lambda$  ( $\lambda < 1$ : population decline,  $\lambda = 1$ : stable population,  $\lambda > 1$ : population growth) between 1982 and 2014:

$$\lambda = \bar{\phi}_{adults} + \bar{\phi}_{fledgling} * \bar{\gamma}_{chicks} \quad [E1.10]$$

with  $\bar{\phi}_{adults}$  and  $\bar{\phi}_{fledgling}$  derived from the model described in eq. E1.3. Moreover, we calculated  $\lambda$  after rescaling each  $\bar{\phi}_k$  using the average sea surface temperature (SST) anomaly (the predictor variable preserved during the model selection exercise; see 'Results') (1) between the years 1982 and 1996; (2) between the years 1996 and 2014. This cut-off was based on visual examination of the SST anomaly, which implies that the SST increased above average after 1996.

## Future projections

To assess the future developments of the penguin population we ran a series of stochastic projections based on our population model. Firstly we simulated future SST anomaly developments until 2060 which included the predicted SST rise for the Otago region of 2.0°C between 1990 and 2090 which translates to a mean 0.02°C increase per year (Ministry for the Environment 2008). For each future year up until 2065, we firstly randomly selected 12 monthly averages (i.e. Jan-Dec) from the SST data recorded between 1982 and 2015 data to calculate an annual mean. We then cumulatively added 0.02°C to each simulated annual mean (i.e. 2015-2060) and calculated the corresponding SST anomaly as difference of the average annual SST anomaly. We ran 1,000 iterations of this simulation and used the mean of all simulations as the projected SST anomaly, which served to predict future survival rates using eq. 1 and 2 and parameters estimated from the MR data. Each forward prediction of survival rates was repeated 500 times for all posterior samples to allow for uncertainty owing to temporal stochasticity. These predicted survival rates were then used to forward project the adult population size from 2015 onwards. After 2012 it was difficult to determine whether an individual's absence was due to absence from breeding or actual mortality. To ensure that the future projections are not affected through underestimated survival rates between 2012 and 2014, we re-fitted the MR

model to data sets limited to the years 1982-2011, 1982-2012 and 1982-2013; and started each projection in 2012, 2013 and 2014, respectively.

## References

- Burnham, K.P., 1987. Design and analysis methods for fish survival experiments based on release-recapture. American Fisheries Society.
- Gelman, A., 2013. Two simple examples for understanding posterior p-values whose distributions are far from uniform. *Electronic Journal of Statistics* 7, 2595-2602.
- Gelman, A., Meng, X.-L., Stern, H., 1996. Posterior predictive assessment of model fitness via realized discrepancies. *Statistica sinica*, 733-760.
- Gimenez, O., Morgan, B., Brooks, S., 2008. Weak identifiability in models for mark-recapture-recovery data, In *Modeling demographic processes in marked populations*. eds D.L. Thomson, E.G. Cooch, M.J. Conroy, pp. 1055-1067. Springer Science & Business Media.
- Grosbois, V., Gimenez, O., Gaillard, J.M., Pradel, R., Barbraud, C., Clobert, J., Møller, A., Weimerskirch, H., 2008. Assessing the impact of climate variation on survival in vertebrate populations. *Biological Reviews* 83, 357-399.
- Kéry, M., Schaub, M., 2012. Bayesian population analysis using WinBUGS: a hierarchical perspective. Academic Press.
- Lebreton, J., Burnham, K., Clobert J, Anderson, D., 1992. Modeling survival and testing biological hypotheses using marked animals - A unified approach with case-studies. *Ecological Monographs* 62, 67-118.
- Ministry for the Environment, 2008. Climate Change Effects and Impacts Assessment: A Guidance Manual for Local Government in New Zealand. 2nd Edition., eds B. Mullan, D. Wratt, S. Dean, M. Hollis, S. Allan, T. Williams, G. Kenny, p. xviii + 149 p. Ministry for the Environment,, Wellington.

Plummer, M., 2003. JAGS: A program for analysis of Bayesian graphical models using Gibbs sampling, In Proceedings of the 3rd international workshop on distributed statistical computing. p. 125. Technische Universit at Wien Wien, Austria.

Tang, S., Chen, L., 2002. Density-dependent birth rate, birth pulses and their population dynamic consequences. *Journal of Mathematical Biology* 44, 185-199.

m-array adults

|      | 1983 | 1984 | 1985 | 1986 | 1987 | 1988 | 1989 | 1990 | 1991 | 1992 | 1993 | 1994 | 1995 | 1996 | 1997 | 1998 | 1999 | 2000 | 2001 | 2002 | 2003 | 2004 | 2005 | 2006 | 2007 | 2008 | 2009 | 2010 | 2011 | 2012 | 2013 | 2014 | 2015 | never recaptured |
|------|------|------|------|------|------|------|------|------|------|------|------|------|------|------|------|------|------|------|------|------|------|------|------|------|------|------|------|------|------|------|------|------|------|------------------|
| 1982 | 4    | 0    | 0    | 0    | 0    | 0    | 0    | 0    | 0    | 0    | 0    | 0    | 0    | 0    | 0    | 0    | 0    | 0    | 0    | 0    | 0    | 0    | 0    | 0    | 0    | 0    | 0    | 0    | 0    | 0    | 0    | 0    | 0    | 0                |
| 1983 | 0    | 53   | 0    | 0    | 0    | 0    | 0    | 0    | 0    | 0    | 0    | 0    | 0    | 0    | 0    | 0    | 0    | 0    | 0    | 0    | 0    | 0    | 0    | 0    | 0    | 0    | 0    | 0    | 0    | 0    | 0    | 0    | 0    | 0                |
| 1984 | 0    | 0    | 90   | 0    | 0    | 0    | 0    | 0    | 0    | 0    | 0    | 0    | 0    | 0    | 0    | 0    | 0    | 0    | 0    | 0    | 0    | 0    | 0    | 0    | 0    | 0    | 0    | 0    | 0    | 0    | 0    | 0    | 0    | 32               |
| 1985 | 0    | 0    | 0    | 100  | 0    | 0    | 0    | 0    | 0    | 0    | 0    | 0    | 0    | 0    | 0    | 0    | 0    | 0    | 0    | 0    | 0    | 0    | 0    | 0    | 0    | 0    | 0    | 0    | 0    | 0    | 0    | 0    | 0    | 33               |
| 1986 | 0    | 0    | 0    | 0    | 95   | 0    | 0    | 0    | 0    | 0    | 0    | 0    | 0    | 0    | 0    | 0    | 0    | 0    | 0    | 0    | 0    | 0    | 0    | 0    | 0    | 0    | 0    | 0    | 0    | 0    | 0    | 0    | 0    | 20               |
| 1987 | 0    | 0    | 0    | 0    | 0    | 94   | 0    | 0    | 0    | 0    | 0    | 0    | 0    | 0    | 0    | 0    | 0    | 0    | 0    | 0    | 0    | 0    | 0    | 0    | 0    | 0    | 0    | 0    | 0    | 0    | 0    | 0    | 0    | 17               |
| 1988 | 0    | 0    | 0    | 0    | 0    | 0    | 115  | 0    | 0    | 0    | 0    | 0    | 0    | 0    | 0    | 0    | 0    | 0    | 0    | 0    | 0    | 0    | 0    | 0    | 0    | 0    | 0    | 0    | 0    | 0    | 0    | 0    | 0    | 8                |
| 1989 | 0    | 0    | 0    | 0    | 0    | 0    | 0    | 125  | 0    | 0    | 0    | 0    | 0    | 0    | 0    | 0    | 0    | 0    | 0    | 0    | 0    | 0    | 0    | 0    | 0    | 0    | 0    | 0    | 0    | 0    | 0    | 0    | 0    | 30               |
| 1990 | 0    | 0    | 0    | 0    | 0    | 0    | 0    | 0    | 139  | 0    | 0    | 0    | 0    | 0    | 0    | 0    | 0    | 0    | 0    | 0    | 0    | 0    | 0    | 0    | 0    | 0    | 0    | 0    | 0    | 0    | 0    | 0    | 0    | 2                |
| 1991 | 0    | 0    | 0    | 0    | 0    | 0    | 0    | 0    | 0    | 153  | 0    | 0    | 0    | 0    | 0    | 0    | 0    | 0    | 0    | 0    | 0    | 0    | 0    | 0    | 0    | 0    | 0    | 0    | 0    | 0    | 0    | 0    | 0    | 8                |
| 1992 | 0    | 0    | 0    | 0    | 0    | 0    | 0    | 0    | 0    | 0    | 162  | 0    | 0    | 0    | 0    | 0    | 0    | 0    | 0    | 0    | 0    | 0    | 0    | 0    | 0    | 0    | 0    | 0    | 0    | 0    | 0    | 0    | 0    | 14               |
| 1993 | 0    | 0    | 0    | 0    | 0    | 0    | 0    | 0    | 0    | 0    | 0    | 202  | 0    | 0    | 0    | 0    | 0    | 0    | 0    | 0    | 0    | 0    | 0    | 0    | 0    | 0    | 0    | 0    | 0    | 0    | 0    | 0    | 0    | 7                |
| 1994 | 0    | 0    | 0    | 0    | 0    | 0    | 0    | 0    | 0    | 0    | 0    | 0    | 242  | 0    | 0    | 0    | 0    | 0    | 0    | 0    | 0    | 0    | 0    | 0    | 0    | 0    | 0    | 0    | 0    | 0    | 0    | 0    | 0    | 15               |
| 1995 | 0    | 0    | 0    | 0    | 0    | 0    | 0    | 0    | 0    | 0    | 0    | 0    | 0    | 270  | 0    | 0    | 0    | 0    | 0    | 0    | 0    | 0    | 0    | 0    | 0    | 0    | 0    | 0    | 0    | 0    | 0    | 0    | 0    | 22               |
| 1996 | 0    | 0    | 0    | 0    | 0    | 0    | 0    | 0    | 0    | 0    | 0    | 0    | 0    | 0    | 258  | 0    | 0    | 0    | 0    | 0    | 0    | 0    | 0    | 0    | 0    | 0    | 0    | 0    | 0    | 0    | 0    | 0    | 0    | 66               |
| 1997 | 0    | 0    | 0    | 0    | 0    | 0    | 0    | 0    | 0    | 0    | 0    | 0    | 0    | 0    | 0    | 254  | 0    | 0    | 0    | 0    | 0    | 0    | 0    | 0    | 0    | 0    | 0    | 0    | 0    | 0    | 0    | 0    | 0    | 44               |
| 1998 | 0    | 0    | 0    | 0    | 0    | 0    | 0    | 0    | 0    | 0    | 0    | 0    | 0    | 0    | 0    | 0    | 245  | 0    | 0    | 0    | 0    | 0    | 0    | 0    | 0    | 0    | 0    | 0    | 0    | 0    | 0    | 0    | 0    | 35               |
| 1999 | 0    | 0    | 0    | 0    | 0    | 0    | 0    | 0    | 0    | 0    | 0    | 0    | 0    | 0    | 0    | 0    | 0    | 225  | 0    | 0    | 0    | 0    | 0    | 0    | 0    | 0    | 0    | 0    | 0    | 0    | 0    | 0    | 0    | 35               |
| 2000 | 0    | 0    | 0    | 0    | 0    | 0    | 0    | 0    | 0    | 0    | 0    | 0    | 0    | 0    | 0    | 0    | 0    | 0    | 208  | 0    | 0    | 0    | 0    | 0    | 0    | 0    | 0    | 0    | 0    | 0    | 0    | 0    | 0    | 27               |
| 2001 | 0    | 0    | 0    | 0    | 0    | 0    | 0    | 0    | 0    | 0    | 0    | 0    | 0    | 0    | 0    | 0    | 0    | 0    | 0    | 0    | 171  | 0    | 0    | 0    | 0    | 0    | 0    | 0    | 0    | 0    | 0    | 0    | 0    | 68               |
| 2002 | 0    | 0    | 0    | 0    | 0    | 0    | 0    | 0    | 0    | 0    | 0    | 0    | 0    | 0    | 0    | 0    | 0    | 0    | 0    | 0    | 0    | 158  | 0    | 0    | 0    | 0    | 0    | 0    | 0    | 0    | 0    | 0    | 0    | 26               |
| 2003 | 0    | 0    | 0    | 0    | 0    | 0    | 0    | 0    | 0    | 0    | 0    | 0    | 0    | 0    | 0    | 0    | 0    | 0    | 0    | 0    | 0    | 0    | 153  | 0    | 0    | 0    | 0    | 0    | 0    | 0    | 0    | 0    | 0    | 19               |
| 2004 | 0    | 0    | 0    | 0    | 0    | 0    | 0    | 0    | 0    | 0    | 0    | 0    | 0    | 0    | 0    | 0    | 0    | 0    | 0    | 0    | 0    | 0    | 0    | 169  | 0    | 0    | 0    | 0    | 0    | 0    | 0    | 0    | 0    | 17               |
| 2005 | 0    | 0    | 0    | 0    | 0    | 0    | 0    | 0    | 0    | 0    | 0    | 0    | 0    | 0    | 0    | 0    | 0    | 0    | 0    | 0    | 0    | 0    | 0    | 0    | 173  | 0    | 0    | 0    | 0    | 0    | 0    | 0    | 0    | 22               |
| 2006 | 0    | 0    | 0    | 0    | 0    | 0    | 0    | 0    | 0    | 0    | 0    | 0    | 0    | 0    | 0    | 0    | 0    | 0    | 0    | 0    | 0    | 0    | 0    | 0    | 0    | 163  | 0    | 0    | 0    | 0    | 0    | 0    | 0    | 31               |
| 2007 | 0    | 0    | 0    | 0    | 0    | 0    | 0    | 0    | 0    | 0    | 0    | 0    | 0    | 0    | 0    | 0    | 0    | 0    | 0    | 0    | 0    | 0    | 0    | 0    | 0    | 0    | 146  | 0    | 0    | 0    | 0    | 0    | 0    | 21               |
| 2008 | 0    | 0    | 0    | 0    | 0    | 0    | 0    | 0    | 0    | 0    | 0    | 0    | 0    | 0    | 0    | 0    | 0    | 0    | 0    | 0    | 0    | 0    | 0    | 0    | 0    | 0    | 0    | 125  | 0    | 0    | 0    | 0    | 0    | 32               |
| 2009 | 0    | 0    | 0    | 0    | 0    | 0    | 0    | 0    | 0    | 0    | 0    | 0    | 0    | 0    | 0    | 0    | 0    | 0    | 0    | 0    | 0    | 0    | 0    | 0    | 0    | 0    | 0    | 0    | 112  | 0    | 0    | 0    | 0    | 15               |
| 2010 | 0    | 0    | 0    | 0    | 0    | 0    | 0    | 0    | 0    | 0    | 0    | 0    | 0    | 0    | 0    | 0    | 0    | 0    | 0    | 0    | 0    | 0    | 0    | 0    | 0    | 0    | 0    | 0    | 0    | 136  | 0    | 0    | 0    | 17               |
| 2011 | 0    | 0    | 0    | 0    | 0    | 0    | 0    | 0    | 0    | 0    | 0    | 0    | 0    | 0    | 0    | 0    | 0    | 0    | 0    | 0    | 0    | 0    | 0    | 0    | 0    | 0    | 0    | 0    | 0    | 0    | 137  | 0    | 0    | 10               |
| 2012 | 0    | 0    | 0    | 0    | 0    | 0    | 0    | 0    | 0    | 0    | 0    | 0    | 0    | 0    | 0    | 0    | 0    | 0    | 0    | 0    | 0    | 0    | 0    | 0    | 0    | 0    | 0    | 0    | 0    | 0    | 120  | 0    | 0    | 45               |
| 2013 | 0    | 0    | 0    | 0    | 0    | 0    | 0    | 0    | 0    | 0    | 0    | 0    | 0    | 0    | 0    | 0    | 0    | 0    | 0    | 0    | 0    | 0    | 0    | 0    | 0    | 0    | 0    | 0    | 0    | 0    | 0    | 76   | 0    | 62               |
| 2014 | 0    | 0    | 0    | 0    | 0    | 0    | 0    | 0    | 0    | 0    | 0    | 0    | 0    | 0    | 0    | 0    | 0    | 0    | 0    | 0    | 0    | 0    | 0    | 0    | 0    | 0    | 0    | 0    | 0    | 0    | 0    | 0    | 37   | 39               |

m-array fledglings

|      | 1983 | 1984 | 1985 | 1986 | 1987 | 1988 | 1989 | 1990 | 1991 | 1992 | 1993 | 1994 | 1995 | 1996 | 1997 | 1998 | 1999 | 2000 | 2001 | 2002 | 2003 | 2004 | 2005 | 2006 | 2007 | 2008 | 2009 | 2010 | 2011 | 2012 | 2013 | 2014 | 2015 | never recaptured |     |
|------|------|------|------|------|------|------|------|------|------|------|------|------|------|------|------|------|------|------|------|------|------|------|------|------|------|------|------|------|------|------|------|------|------|------------------|-----|
| 1982 | 2    | 0    | 0    | 0    | 0    | 0    | 0    | 0    | 0    | 0    | 0    | 0    | 0    | 0    | 0    | 0    | 0    | 0    | 0    | 0    | 0    | 0    | 0    | 0    | 0    | 0    | 0    | 0    | 0    | 0    | 0    | 0    | 0    | 0                |     |
| 1983 | 0    | 2    | 0    | 0    | 0    | 0    | 0    | 0    | 0    | 0    | 0    | 0    | 0    | 0    | 0    | 0    | 0    | 0    | 0    | 0    | 0    | 0    | 0    | 0    | 0    | 0    | 0    | 0    | 0    | 0    | 0    | 0    | 0    | 0                | 16  |
| 1984 | 0    | 0    | 8    | 0    | 0    | 0    | 0    | 0    | 0    | 0    | 0    | 0    | 0    | 0    | 0    | 0    | 0    | 0    | 0    | 0    | 0    | 0    | 0    | 0    | 0    | 0    | 0    | 0    | 0    | 0    | 0    | 0    | 0    | 0                | 182 |
| 1985 | 0    | 0    | 0    | 2    | 0    | 0    | 0    | 0    | 0    | 0    | 0    | 0    | 0    | 0    | 0    | 0    | 0    | 0    | 0    | 0    | 0    | 0    | 0    | 0    | 0    | 0    | 0    | 0    | 0    | 0    | 0    | 0    | 0    | 0                | 158 |
| 1986 | 0    | 0    | 0    | 0    | 3    | 0    | 0    | 0    | 0    | 0    | 0    | 0    | 0    | 0    | 0    | 0    | 0    | 0    | 0    | 0    | 0    | 0    | 0    | 0    | 0    | 0    | 0    | 0    | 0    | 0    | 0    | 0    | 0    | 0                | 30  |
| 1987 | 0    | 0    | 0    | 0    | 0    | 22   | 0    | 0    | 0    | 0    | 0    | 0    | 0    | 0    | 0    | 0    | 0    | 0    | 0    | 0    | 0    | 0    | 0    | 0    | 0    | 0    | 0    | 0    | 0    | 0    | 0    | 0    | 0    | 0                | 60  |
| 1988 | 0    | 0    | 0    | 0    | 0    | 0    | 31   | 0    | 0    | 0    | 0    | 0    | 0    | 0    | 0    | 0    | 0    | 0    | 0    | 0    | 0    | 0    | 0    | 0    | 0    | 0    | 0    | 0    | 0    | 0    | 0    | 0    | 0    | 0                | 92  |
| 1989 | 0    | 0    | 0    | 0    | 0    | 0    | 0    | 3    | 0    | 0    | 0    | 0    | 0    | 0    | 0    | 0    | 0    | 0    | 0    | 0    | 0    | 0    | 0    | 0    | 0    | 0    | 0    | 0    | 0    | 0    | 0    | 0    | 0    | 0                | 65  |
| 1990 | 0    | 0    | 0    | 0    | 0    | 0    | 0    | 0    | 1    | 0    | 0    | 0    | 0    | 0    | 0    | 0    | 0    | 0    | 0    | 0    | 0    | 0    | 0    | 0    | 0    | 0    | 0    | 0    | 0    | 0    | 0    | 0    | 0    | 0                | 27  |
| 1991 | 0    | 0    | 0    | 0    | 0    | 0    | 0    | 0    | 0    | 14   | 0    | 0    | 0    | 0    | 0    | 0    | 0    | 0    | 0    | 0    | 0    | 0    | 0    | 0    | 0    | 0    | 0    | 0    | 0    | 0    | 0    | 0    | 0    | 0                | 65  |
| 1992 | 0    | 0    | 0    | 0    | 0    | 0    | 0    | 0    | 0    | 0    | 36   | 0    | 0    | 0    | 0    | 0    | 0    | 0    | 0    | 0    | 0    | 0    | 0    | 0    | 0    | 0    | 0    | 0    | 0    | 0    | 0    | 0    | 0    | 0                | 51  |
| 1993 | 0    | 0    | 0    | 0    | 0    | 0    | 0    | 0    | 0    | 0    | 0    | 47   | 0    | 0    | 0    | 0    | 0    | 0    | 0    | 0    | 0    | 0    | 0    | 0    | 0    | 0    | 0    | 0    | 0    | 0    | 0    | 0    | 0    | 0                | 44  |
| 1994 | 0    | 0    | 0    | 0    | 0    | 0    | 0    | 0    | 0    | 0    | 0    | 0    | 45   | 0    | 0    | 0    | 0    | 0    | 0    | 0    | 0    | 0    | 0    | 0    | 0    | 0    | 0    | 0    | 0    | 0    | 0    | 0    | 0    | 0                | 55  |
| 1995 | 0    | 0    | 0    | 0    | 0    | 0    | 0    | 0    | 0    | 0    | 0    | 0    | 0    | 41   | 0    | 0    | 0    | 0    | 0    | 0    | 0    | 0    | 0    | 0    | 0    | 0    | 0    | 0    | 0    | 0    | 0    | 0    | 0    | 0                | 88  |
| 1996 | 0    | 0    | 0    | 0    | 0    | 0    | 0    | 0    | 0    | 0    | 0    | 0    | 0    | 0    | 37   | 0    | 0    | 0    | 0    | 0    | 0    | 0    | 0    | 0    | 0    | 0    | 0    | 0    | 0    | 0    | 0    | 0    | 0    | 0                | 126 |
| 1997 | 0    | 0    | 0    | 0    | 0    | 0    | 0    | 0    | 0    | 0    | 0    | 0    | 0    | 0    | 0    | 23   | 0    | 0    | 0    | 0    | 0    | 0    | 0    | 0    | 0    | 0    | 0    | 0    | 0    | 0    | 0    | 0    | 0    | 0                | 97  |
| 1998 | 0    | 0    | 0    | 0    | 0    | 0    | 0    | 0    | 0    | 0    | 0    | 0    | 0    | 0    | 0    | 0    | 7    | 0    | 0    | 0    | 0    | 0    | 0    | 0    | 0    | 0    | 0    | 0    | 0    | 0    | 0    | 0    | 0    | 0                | 66  |
| 1999 | 0    | 0    | 0    | 0    | 0    | 0    | 0    | 0    | 0    | 0    | 0    | 0    | 0    | 0    | 0    | 0    | 0    | 3    | 0    | 0    | 0    | 0    | 0    | 0    | 0    | 0    | 0    | 0    | 0    | 0    | 0    | 0    | 0    | 0                | 25  |
| 2000 | 0    | 0    | 0    | 0    | 0    | 0    | 0    | 0    | 0    | 0    | 0    | 0    | 0    | 0    | 0    | 0    | 0    | 0    | 15   | 0    | 0    | 0    | 0    | 0    | 0    | 0    | 0    | 0    | 0    | 0    | 0    | 0    | 0    | 0                | 70  |
| 2001 | 0    | 0    | 0    | 0    | 0    | 0    | 0    | 0    | 0    | 0    | 0    | 0    | 0    | 0    | 0    | 0    | 0    | 0    | 0    | 0    | 2    | 0    | 0    | 0    | 0    | 0    | 0    | 0    | 0    | 0    | 0    | 0    | 0    | 0                | 81  |
| 2002 | 0    | 0    | 0    | 0    | 0    | 0    | 0    | 0    | 0    | 0    | 0    | 0    | 0    | 0    | 0    | 0    | 0    | 0    | 0    | 0    | 0    | 9    | 0    | 0    | 0    | 0    | 0    | 0    | 0    | 0    | 0    | 0    | 0    | 0                | 39  |
| 2003 | 0    | 0    | 0    | 0    | 0    | 0    | 0    | 0    | 0    | 0    | 0    | 0    | 0    | 0    | 0    | 0    | 0    | 0    | 0    | 0    | 0    | 0    | 29   | 0    | 0    | 0    | 0    | 0    | 0    | 0    | 0    | 0    | 0    | 0                | 46  |
| 2004 | 0    | 0    | 0    | 0    | 0    | 0    | 0    | 0    | 0    | 0    | 0    | 0    | 0    | 0    | 0    | 0    | 0    | 0    | 0    | 0    | 0    | 0    | 0    | 11   | 0    | 0    | 0    | 0    | 0    | 0    | 0    | 0    | 0    | 0                | 25  |
| 2005 | 0    | 0    | 0    | 0    | 0    | 0    | 0    | 0    | 0    | 0    | 0    | 0    | 0    | 0    | 0    | 0    | 0    | 0    | 0    | 0    | 0    | 0    | 0    | 0    | 18   | 0    | 0    | 0    | 0    | 0    | 0    | 0    | 0    | 0                | 70  |
| 2006 | 0    | 0    | 0    | 0    | 0    | 0    | 0    | 0    | 0    | 0    | 0    | 0    | 0    | 0    | 0    | 0    | 0    | 0    | 0    | 0    | 0    | 0    | 0    | 0    | 0    | 2    | 0    | 0    | 0    | 0    | 0    | 0    | 0    | 0                | 49  |
| 2007 | 0    | 0    | 0    | 0    | 0    | 0    | 0    | 0    | 0    | 0    | 0    | 0    | 0    | 0    | 0    | 0    | 0    | 0    | 0    | 0    | 0    | 0    | 0    | 0    | 0    | 0    | 10   | 0    | 0    | 0    | 0    | 0    | 0    | 85               |     |
| 2008 | 0    | 0    | 0    | 0    | 0    | 0    | 0    | 0    | 0    | 0    | 0    | 0    | 0    | 0    | 0    | 0    | 0    | 0    | 0    | 0    | 0    | 0    | 0    | 0    | 0    | 0    | 0    | 1    | 0    | 0    | 0    | 0    | 0    | 45               |     |
| 2009 | 0    | 0    | 0    | 0    | 0    | 0    | 0    | 0    | 0    | 0    | 0    | 0    | 0    | 0    | 0    | 0    | 0    | 0    | 0    | 0    | 0    | 0    | 0    | 0    | 0    | 0    | 0    | 0    | 16   | 0    | 0    | 0    | 0    | 73               |     |
| 2010 | 0    | 0    | 0    | 0    | 0    | 0    | 0    | 0    | 0    | 0    | 0    | 0    | 0    | 0    | 0    | 0    | 0    | 0    | 0    | 0    | 0    | 0    | 0    | 0    | 0    | 0    | 0    | 0    | 0    | 0    | 1    | 0    | 0    | 65               |     |
| 2011 | 0    | 0    | 0    | 0    | 0    | 0    | 0    | 0    | 0    | 0    | 0    | 0    | 0    | 0    | 0    | 0    | 0    | 0    | 0    | 0    | 0    | 0    | 0    | 0    | 0    | 0    | 0    | 0    | 0    | 0    | 5    | 0    | 0    | 71               |     |
| 2012 | 0    | 0    | 0    | 0    | 0    | 0    | 0    | 0    | 0    | 0    | 0    | 0    | 0    | 0    | 0    | 0    | 0    | 0    | 0    | 0    | 0    | 0    | 0    | 0    | 0    | 0    | 0    | 0    | 0    | 0    | 0    | 0    | 0    | 0                | 87  |
| 2013 | 0    | 0    | 0    | 0    | 0    | 0    | 0    | 0    | 0    | 0    | 0    | 0    | 0    | 0    | 0    | 0    | 0    | 0    | 0    | 0    | 0    | 0    | 0    | 0    | 0    | 0    | 0    | 0    | 0    | 0    | 0    | 0    | 0    | 0                | 38  |
| 2014 | 0    | 0    | 0    | 0    | 0    | 0    | 0    | 0    | 0    | 0    | 0    | 0    | 0    | 0    | 0    | 0    | 0    | 0    | 0    | 0    | 0    | 0    | 0    | 0    | 0    | 0    | 0    | 0    | 0    | 0    | 0    | 0    | 0    | 0                | 0   |



**Mean chick survival**

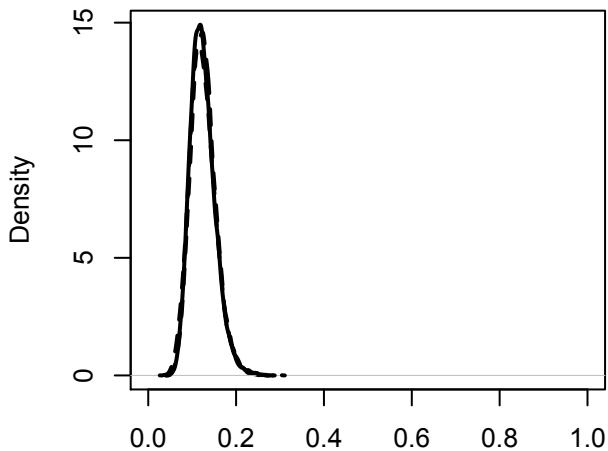

N = 23001 Bandwidth = 0.00328

**Mean adult survival**

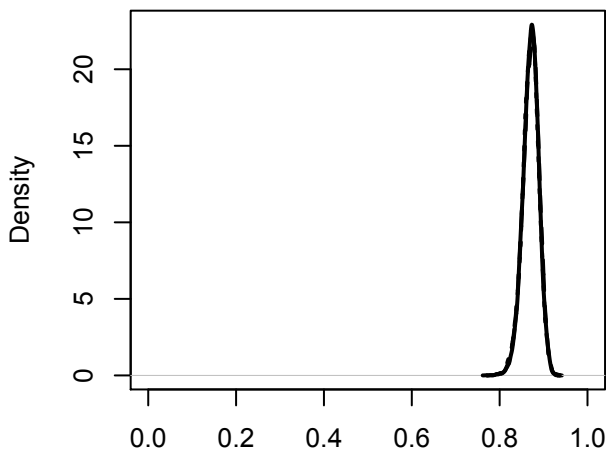

N = 23001 Bandwidth = 0.002144

**Variance in chick survival**

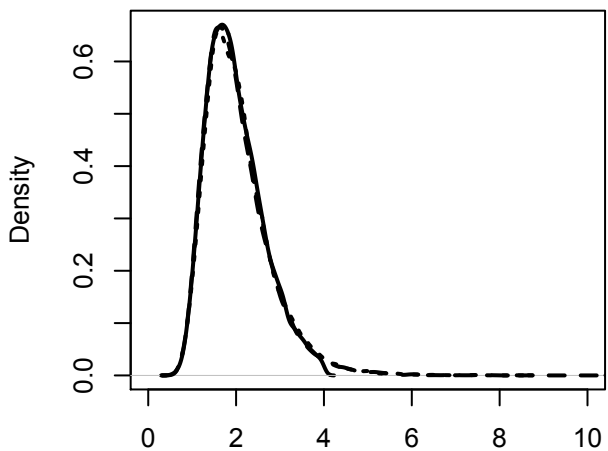

N = 23001 Bandwidth = 0.07663

**Variance in adult survival**

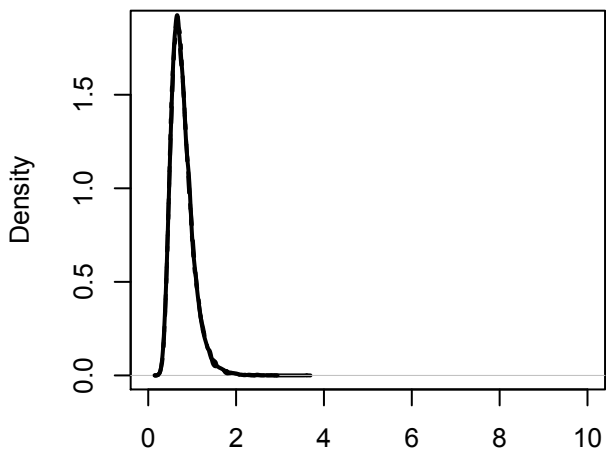

N = 23001 Bandwidth = 0.02786

**crosscorr.cjs.yep.daily\_min\_temp\_annual**

|             | beta.a | beta.j | mean.phiad | mean.phijuv | sigma2.a | sigma2.j |
|-------------|--------|--------|------------|-------------|----------|----------|
| beta.a      | 1      | -0.02  | -0.12      | 0.02        | -0.05    | -0.02    |
| beta.j      |        | 1      | -0.02      | 0.07        | 0        | -0.13    |
| mean.phiad  |        |        | 1          | -0.05       | 0.08     | 0        |
| mean.phijuv |        |        |            | 1           | 0        | -0.08    |
| sigma2.a    |        |        |            |             | 1        | -0.01    |
| sigma2.j    |        |        |            |             |          | 1        |

**crosscorr.cjs.yep.daily\_min\_temp\_mar\_may**

|             | beta.a | beta.j | mean.phiad | mean.phijuv | sigma2.a | sigma2.j |
|-------------|--------|--------|------------|-------------|----------|----------|
| beta.a      | 1      | 0      | -0.07      | -0.01       | -0.06    | -0.02    |
| beta.j      |        | 1      | 0          | 0.08        | 0        | -0.02    |
| mean.phiad  |        |        | 1          | 0           | 0.08     | 0.01     |
| mean.phijuv |        |        |            | 1           | 0        | -0.03    |
| sigma2.a    |        |        |            |             | 1        | 0        |
| sigma2.j    |        |        |            |             |          | 1        |

**crosscorr.cjs.yep.days\_wind\_gusts\_33\_annual**

|             | beta.a | beta.j | mean.phiad | mean.phijuv | sigma2.a | sigma2.j |
|-------------|--------|--------|------------|-------------|----------|----------|
| beta.a      | 1      | 0      | 0.08       | 0.02        | 0.07     | 0.01     |
| beta.j      |        | 1      | 0          | -0.1        | -0.01    | 0.12     |
| mean.phiad  |        |        | 1          | 0           | 0.05     | 0        |
| mean.phijuv |        |        |            | 1           | -0.01    | -0.08    |
| sigma2.a    |        |        |            |             | 1        | 0        |
| sigma2.j    |        |        |            |             |          | 1        |

**crosscorr.cjs.yep.days\_wind\_gusts\_33\_mar\_may**

|             | beta.a | beta.j | mean.phiad | mean.phijuv | sigma2.a | sigma2.j |
|-------------|--------|--------|------------|-------------|----------|----------|
| beta.a      | 1      | -0.02  | 0.06       | 0.01        | 0.09     | 0        |
| beta.j      |        | 1      | -0.01      | -0.07       | 0        | 0.14     |
| mean.phiad  |        |        | 1          | 0.04        | 0.05     | -0.02    |
| mean.phijuv |        |        |            | 1           | 0        | -0.05    |
| sigma2.a    |        |        |            |             | 1        | 0        |
| sigma2.j    |        |        |            |             |          | 1        |

**crosscorr.cjs.yep.max\_1day\_rain\_annual**

|             | beta.a | beta.j | mean.phiad | mean.phijuv | sigma2.a | sigma2.j |
|-------------|--------|--------|------------|-------------|----------|----------|
| beta.a      | 1      | -0.01  | 0.02       | 0           | 0.03     | 0        |
| beta.j      |        | 1      | 0.01       | -0.01       | 0        | -0.03    |
| mean.phiad  |        |        | 1          | -0.01       | 0.02     | 0.01     |
| mean.phijuv |        |        |            | 1           | 0.01     | -0.01    |
| sigma2.a    |        |        |            |             | 1        | 0        |
| sigma2.j    |        |        |            |             |          | 1        |

**crosscorr.cjs.yep.max\_1day\_rain\_mar\_may**

|             | beta.a | beta.j | mean.phiad | mean.phijuv | sigma2.a | sigma2.j |
|-------------|--------|--------|------------|-------------|----------|----------|
| beta.a      | 1      | 0.01   | 0.04       | -0.02       | 0.03     | 0.01     |
| beta.j      |        | 1      | 0.02       | 0.1         | 0.01     | -0.04    |
| mean.phiad  |        |        | 1          | 0.01        | 0.03     | 0.01     |
| mean.phijuv |        |        |            | 1           | -0.01    | -0.07    |
| sigma2.a    |        |        |            |             | 1        | 0        |
| sigma2.j    |        |        |            |             |          | 1        |

**crosscorr.cjs.yep.mean\_air\_temp\_annual**

|             | beta.a | beta.j | mean.phiad | mean.phijuv | sigma2.a | sigma2.j |
|-------------|--------|--------|------------|-------------|----------|----------|
| beta.a      | 1      | 0      | -0.08      | -0.02       | -0.09    | 0        |
| beta.j      |        | 1      | 0.02       | 0.08        | -0.01    | -0.14    |
| mean.phiad  |        |        | 1          | -0.03       | 0.06     | 0        |
| mean.phijuv |        |        |            | 1           | -0.01    | -0.06    |
| sigma2.a    |        |        |            |             | 1        | 0.01     |
| sigma2.j    |        |        |            |             |          | 1        |

**crosscorr.cjs.yep.mean\_air\_temp\_mar\_may**

|             | beta.a | beta.j | mean.phiad | mean.phijuv | sigma2.a | sigma2.j |
|-------------|--------|--------|------------|-------------|----------|----------|
| beta.a      | 1      | 0.05   | -0.07      | 0           | -0.04    | 0        |
| beta.j      |        | 1      | -0.02      | 0.09        | -0.01    | -0.06    |
| mean.phiad  |        |        | 1          | 0.01        | 0.06     | 0        |
| mean.phijuv |        |        |            | 1           | 0        | -0.07    |
| sigma2.a    |        |        |            |             | 1        | 0.01     |
| sigma2.j    |        |        |            |             |          | 1        |

**crosscorr.cjs.yep.sst\_anomaly\_austral**

|             | beta.a | beta.j | mean.phiad | mean.phijuv | sigma2.a | sigma2.j |
|-------------|--------|--------|------------|-------------|----------|----------|
| beta.a      | 1      | -0.01  | -0.38      | 0.01        | -0.06    | 0.01     |
| beta.j      |        | 1      | 0.01       | -0.25       | 0        | -0.2     |
| mean.phiad  |        |        | 1          | -0.03       | 0.06     | -0.02    |
| mean.phijuv |        |        |            | 1           | -0.01    | 0.03     |
| sigma2.a    |        |        |            |             | 1        | 0        |
| sigma2.j    |        |        |            |             |          | 1        |

**crosscorr.cjs.yep.sst\_anomaly\_mar\_june**

|             | beta.a | beta.j | mean.phiad | mean.phijuv | sigma2.a | sigma2.j |
|-------------|--------|--------|------------|-------------|----------|----------|
| beta.a      | 1      | -0.03  | -0.36      | 0.02        | -0.07    | -0.01    |
| beta.j      |        | 1      | 0.01       | -0.21       | 0        | -0.04    |
| mean.phiad  |        |        | 1          | -0.02       | 0.09     | 0.01     |
| mean.phijuv |        |        |            | 1           | -0.01    | -0.03    |
| sigma2.a    |        |        |            |             | 1        | -0.01    |
| sigma2.j    |        |        |            |             |          | 1        |

**crosscorr.cjs.yep.sst\_anomaly\_minus\_1yr**

|             | beta.a | beta.j | mean.phiad | mean.phijuv | sigma2.a | sigma2.j |
|-------------|--------|--------|------------|-------------|----------|----------|
| beta.a      | 1      | 0      | -0.35      | -0.01       | -0.06    | -0.01    |
| beta.j      |        | 1      | -0.02      | -0.21       | -0.02    | 0        |
| mean.phiad  |        |        | 1          | 0           | 0.08     | -0.01    |
| mean.phijuv |        |        |            | 1           | 0.01     | -0.04    |
| sigma2.a    |        |        |            |             | 1        | 0        |
| sigma2.j    |        |        |            |             |          | 1        |

**crosscorr.cjs.yep.sst\_anomaly\_minus\_2yrs**

|             | beta.a | beta.j | mean.phiad | mean.phijuv | sigma2.a | sigma2.j |
|-------------|--------|--------|------------|-------------|----------|----------|
| beta.a      | 1      | 0.01   | -0.21      | -0.01       | 0.01     | 0.01     |
| beta.j      |        | 1      | 0          | -0.22       | -0.02    | 0.01     |
| mean.phiad  |        |        | 1          | -0.04       | 0.05     | 0        |
| mean.phijuv |        |        |            | 1           | 0        | 0.02     |
| sigma2.a    |        |        |            |             | 1        | 0        |
| sigma2.j    |        |        |            |             |          | 1        |

**crosscorr.cjs.yep.total\_rainfall\_annual**

|             | beta.a | beta.j | mean.phiad | mean.phijuv | sigma2.a | sigma2.j |
|-------------|--------|--------|------------|-------------|----------|----------|
| beta.a      | 1      | -0.01  | 0          | 0.01        | 0.03     | 0.01     |
| beta.j      |        | 1      | 0.01       | 0.02        | 0        | -0.06    |
| mean.phiad  |        |        | 1          | -0.03       | 0.04     | -0.01    |
| mean.phijuv |        |        |            | 1           | 0        | -0.02    |
| sigma2.a    |        |        |            |             | 1        | 0        |
| sigma2.j    |        |        |            |             |          | 1        |

**crosscorr.cjs.yep.total\_rainfall\_mar\_may**

|             | beta.a | beta.j | mean.phiad | mean.phijuv | sigma2.a | sigma2.j |
|-------------|--------|--------|------------|-------------|----------|----------|
| beta.a      | 1      | 0      | 0.01       | 0.02        | 0.06     | -0.01    |
| beta.j      |        | 1      | 0.01       | 0.09        | 0.01     | -0.05    |
| mean.phiad  |        |        | 1          | 0           | 0.02     | 0        |
| mean.phijuv |        |        |            | 1           | -0.01    | -0.05    |
| sigma2.a    |        |        |            |             | 1        | 0        |
| sigma2.j    |        |        |            |             |          | 1        |

**crosscorr.cjs.yep.wet\_days\_annual**

|             | beta.a | beta.j | mean.phiad | mean.phijuv | sigma2.a | sigma2.j |
|-------------|--------|--------|------------|-------------|----------|----------|
| beta.a      | 1      | 0      | 0.01       | -0.02       | 0.01     | -0.02    |
| beta.j      |        | 1      | 0.03       | -0.04       | 0.02     | 0.06     |
| mean.phiad  |        |        | 1          | 0.01        | 0.06     | 0        |
| mean.phijuv |        |        |            | 1           | 0.02     | -0.02    |
| sigma2.a    |        |        |            |             | 1        | -0.01    |
| sigma2.j    |        |        |            |             |          | 1        |

**crosscorr.cjs.yep.wet\_days\_mar\_may**

|             | beta.a | beta.j | mean.phiad | mean.phijuv | sigma2.a | sigma2.j |
|-------------|--------|--------|------------|-------------|----------|----------|
| beta.a      | 1      | -0.01  | -0.01      | 0.02        | 0        | -0.01    |
| beta.j      |        | 1      | 0.01       | 0.04        | 0        | -0.01    |
| mean.phiad  |        |        | 1          | 0           | 0.07     | 0        |
| mean.phijuv |        |        |            | 1           | 0        | 0        |
| sigma2.a    |        |        |            |             | 1        | 0.01     |
| sigma2.j    |        |        |            |             |          | 1        |

**Mean chick survival**

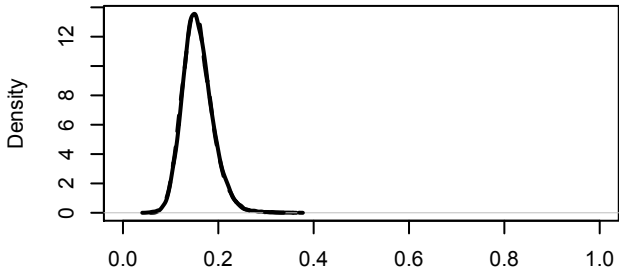

N = 23001 Bandwidth = 0.003619

**Mean adult survival**

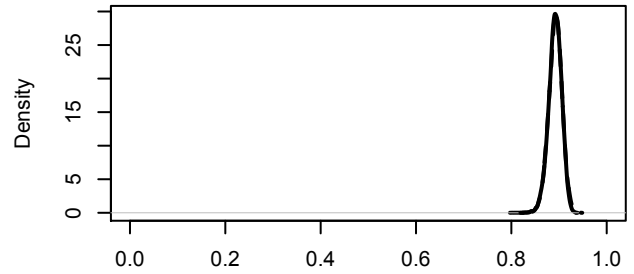

N = 23001 Bandwidth = 0.001621

**Variance in chick survival**

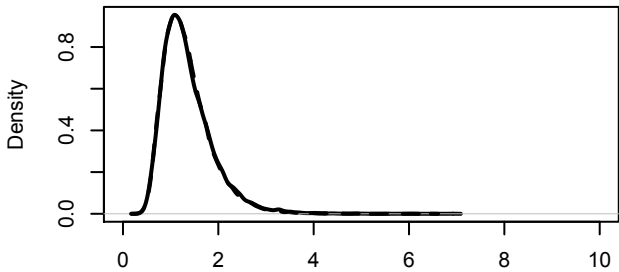

N = 23001 Bandwidth = 0.05677

**Variance in adult survival**

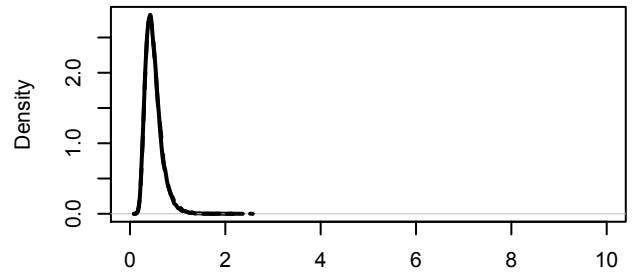

N = 23001 Bandwidth = 0.01861

**Effect size (chicks)**

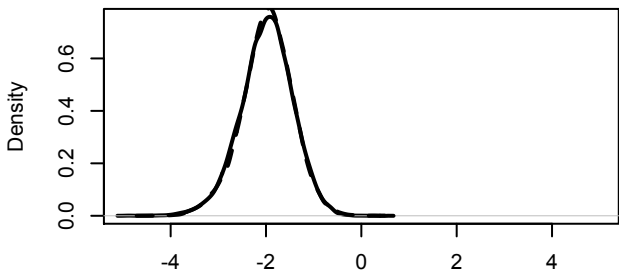

N = 23001 Bandwidth = 0.06422

**Effect size (adults)**

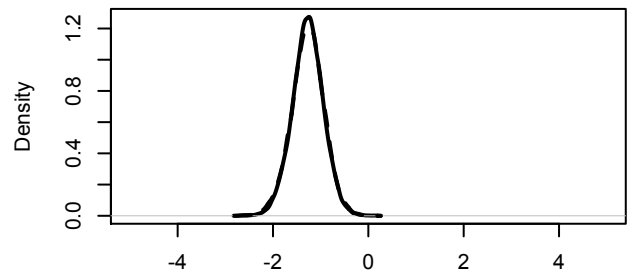

N = 23001 Bandwidth = 0.03845

## Electronic Supplementary Material 5.

### Estimation of the posterior model probability using Gibbs Variable Selection (GVS)

The MR model was simultaneously fitted to the covariates 'sst\_anomaly\_austral' and 'days\_wind\_gusts\_33\_annual' for chick survival (Table 2 in main text) and covariates 'sst\_anomaly\_austral' and 'mean\_air\_temp\_annual' for adult survival. We assessed the posterior model probability ( $p(M_i|y)$ ) for each combination of these four covariates using Gibbs variable selection (GVS) (Ntzoufras 2002; Tenan et al. 2014; Hooten and Hobbs 2015). For this purpose we modeled survival in stage  $k$  at time  $t$  as:

$$\text{logit}(\eta_{k,t}) = \mu_k + \sum_{j=0}^w \gamma_j X_{j,t} \beta_{k,j} + \varepsilon_{k,t} \quad [\text{E5.1}]$$

where  $X_{j,t}$  and  $\beta_{k,j}$  denote the design matrix of covariate  $j$  in year  $t$  and the slope parameter  $j$  for stage  $k$ , respectively ( $w$  is the maximum number of covariates considered).  $\mu_k$  and  $\varepsilon_{k,t}$  reflect the stage-specific mean survival and random effects (see ESM1 eq. E1.1 and eq. E1.2).  $\gamma_j$  denotes the auxiliary indicator variable and is a binary response variable that indicates whether covariate  $\beta_{k,j}$  is present ( $\gamma_j = 1$ ) or absent ( $\gamma_j = 0$ ) in the model. We assumed that the chance that  $\gamma_j = 1$  follows a Bernoulli trial with probability 0.5. To ensure good mixing for indicator  $\gamma_j$  and effect variable  $\beta_{k,j}$  we assumed that both variables depend on each other (Ntzoufras 2002; Tenan et al. 2014) by modeling the prior for  $\beta_{k,j} | (\gamma_j = 1)$  and a pseudoprior for  $\beta_{k,j} | (\gamma_j = 0)$  using a mixture prior:

$$p(\beta_{k,j} | \gamma_j) = (1 - \gamma_j) \text{Normal}(\kappa_j, S_j) + \gamma_j \text{Normal}(0, \Sigma_j) \quad [\text{E5.2}]$$

where  $\kappa_j$  and  $S_j$  are user-defined tuning parameters and  $\Sigma_j$  denotes the fixed prior variance for  $\beta_{k,j}$ . The posterior model probability  $p(M_i|y)$  for each model  $M_i$  ( $i = 16$  possible models for each combination of the considered covariates) is given by:

$$p(M_i|y) = \text{Number of occurrences of } M = i / \text{Total number of iterations}$$

We followed Tenan *et al.* (2014) and checked whether  $p(M_i|y)$  is sensitive to the mixture prior by repeating the analysis with different priors for  $\text{Normal}(\kappa_j, S_j)$ : (1)  $\text{Normal}(\overline{\beta_{k,j}}, \text{SD}(\beta_{k,j}))$ , which is a normal prior for  $\beta_{k,j}$  with mean and standard deviation taken from the posterior distribution of each  $\beta_{k,j}$  of separate model runs; (2)  $N(0, 10)$ ; (3)  $N(0, 100)$ ; (4)  $N(0, 1000)$ ; (5)  $N(0, 10^6)$ ; (6)  $N(0.2, 100)$  (Tenan *et al.* 2014).

The burn-in was 1,400,000 iterations followed by 1,500,000 iterations and posterior samples were drawn using a thinning interval 3. We computed the potential scale reducing factor (Gelman and Rubin 1992) using the output of three MCMC chains and assumed convergence if was near to 1. For all estimated parameters was smaller than or equal to 1.01. Overall there exist no sensitivity of the estimated posterior model probability to the set of prior distributions used (Table E5.1-Table E5.6). Prior set (5) did not fully converge, but produced similar results to all other prior configurations (Table E5.5).

**Table E5.1** Posterior model probability  $p(M_i|y)$  using actual posterior distributions estimated for each  $\beta_k$ . Column A: The MR model considers the covariate *sst\_anomaly\_austral* for chick survival; Column B: The MR model considers the covariate *days\_wind\_gusts\_33\_annual* for chick survival; Column C: The MR model considers the covariate *sst\_anomaly\_austral* for adult survival; Column D: The MR model considers the covariate *mean\_air\_temp\_annual* for adult survival.

|                      | <b>Model configuration</b> |          |          |          |                           |
|----------------------|----------------------------|----------|----------|----------|---------------------------|
| <b>M<sub>i</sub></b> | <b>A</b>                   | <b>B</b> | <b>C</b> | <b>D</b> | <b>p(M<sub>i</sub> y)</b> |
| 1                    | 1                          | 0        | 1        | 0        | 0.42                      |
| 2                    | 0                          | 1        | 1        | 0        | 0.13                      |
| 3                    | 1                          | 1        | 1        | 0        | 0.12                      |
| 4                    | 1                          | 0        | 0        | 1        | 0.09                      |
| 5                    | 0                          | 1        | 0        | 1        | 0.06                      |
| 6                    | 0                          | 0        | 0        | 0        | 0.04                      |
| 7                    | 1                          | 0        | 0        | 0        | 0.03                      |
| 8                    | 0                          | 1        | 0        | 0        | 0.03                      |
| 9                    | 1                          | 1        | 0        | 0        | 0.02                      |
| 10                   | 0                          | 0        | 1        | 0        | 0.01                      |
| 11                   | 0                          | 0        | 0        | 1        | 0.01                      |
| 12                   | 1                          | 1        | 0        | 1        | 0.01                      |
| 13                   | 0                          | 0        | 1        | 1        | 0.00                      |
| 14                   | 1                          | 0        | 1        | 1        | 0.00                      |
| 15                   | 0                          | 1        | 1        | 1        | 0.00                      |
| 16                   | 1                          | 1        | 1        | 1        | 0.00                      |



**Table E5.2** Posterior model probability  $p(M_i|y)$  using a normally distributed prior for  $\beta_k$ :  $N(0, 10)$ . See Column A: The MR model considers the covariate *sst\_anomaly\_austral* for chick survival; Column B: The MR model considers the covariate *days\_wind\_gusts\_33\_annual* for chick survival; Column C: The MR model considers the covariate *sst\_anomaly\_austral* for adult survival; Column D: The MR model considers the covariate *mean\_air\_temp\_annual* for adult survival.

|                      | <b>Model configuration</b> |          |          |          |                           |
|----------------------|----------------------------|----------|----------|----------|---------------------------|
| <b>M<sub>i</sub></b> | <b>A</b>                   | <b>B</b> | <b>C</b> | <b>D</b> | <b>p(M<sub>i</sub> y)</b> |
| 1                    | 1                          | 0        | 1        | 0        | 0.35                      |
| 2                    | 1                          | 0        | 0        | 1        | 0.17                      |
| 3                    | 0                          | 1        | 1        | 0        | 0.15                      |
| 4                    | 1                          | 1        | 1        | 0        | 0.07                      |
| 5                    | 0                          | 1        | 0        | 1        | 0.05                      |
| 6                    | 0                          | 0        | 0        | 0        | 0.04                      |
| 7                    | 1                          | 0        | 0        | 0        | 0.04                      |
| 8                    | 0                          | 1        | 0        | 0        | 0.03                      |
| 9                    | 1                          | 1        | 0        | 0        | 0.03                      |
| 10                   | 0                          | 0        | 1        | 0        | 0.02                      |
| 11                   | 0                          | 0        | 0        | 1        | 0.01                      |
| 12                   | 1                          | 1        | 0        | 1        | 0.01                      |
| 13                   | 0                          | 0        | 1        | 1        | 0.00                      |
| 14                   | 1                          | 0        | 1        | 1        | 0.00                      |
| 15                   | 0                          | 1        | 1        | 1        | 0.00                      |
| 16                   | 1                          | 1        | 1        | 1        | 0.00                      |

**Table E5.3** Posterior model probability  $p(M_i|y)$  using a normally distributed prior for  $\beta_k$ :  $N(0, 100)$ . Column A: The MR model considers the covariate *sst\_anomaly\_austral* for chick survival; Column B: The MR model considers the covariate *days\_wind\_gusts\_33\_annual* for chick survival; Column C: The MR model considers the covariate *sst\_anomaly\_austral* for adult survival; Column D: The MR model considers the covariate *mean\_air\_temp\_annual* for adult survival.

|                      | <b>Model configuration</b> |          |          |          |                           |
|----------------------|----------------------------|----------|----------|----------|---------------------------|
| <b>M<sub>i</sub></b> | <b>A</b>                   | <b>B</b> | <b>C</b> | <b>D</b> | <b>p(M<sub>i</sub> y)</b> |
| 1                    | 1                          | 0        | 1        | 0        | 0.43                      |
| 2                    | 1                          | 0        | 0        | 1        | 0.19                      |
| 3                    | 0                          | 1        | 1        | 0        | 0.11                      |
| 4                    | 1                          | 1        | 1        | 0        | 0.06                      |
| 5                    | 0                          | 1        | 0        | 1        | 0.05                      |
| 6                    | 0                          | 0        | 0        | 0        | 0.05                      |
| 7                    | 1                          | 0        | 0        | 0        | 0.04                      |
| 8                    | 0                          | 1        | 0        | 0        | 0.02                      |
| 9                    | 1                          | 1        | 0        | 0        | 0.02                      |
| 10                   | 0                          | 0        | 1        | 0        | 0.01                      |
| 11                   | 0                          | 0        | 0        | 1        | 0.01                      |
| 12                   | 1                          | 1        | 0        | 1        | 0.00                      |
| 13                   | 0                          | 0        | 1        | 1        | 0.00                      |
| 14                   | 1                          | 0        | 1        | 1        | 0.00                      |
| 15                   | 0                          | 1        | 1        | 1        | 0.00                      |
| 16                   | 1                          | 1        | 1        | 1        | 0.00                      |

**Table E5.4** Posterior model probability  $p(M_i|y)$  using a normally distributed prior for  $\beta_k$ :  $N(0, 1000)$ . Column A: The MR model considers the covariate *sst\_anomaly\_austral* for chick survival; Column B: The MR model considers the covariate *days\_wind\_gusts\_33\_annual* for chick survival; Column C: The MR model considers the covariate *sst\_anomaly\_austral* for adult survival; Column D: The MR model considers the covariate *mean\_air\_temp\_annual* for adult survival.

|                      | <b>Model configuration</b> |          |          |          |                           |
|----------------------|----------------------------|----------|----------|----------|---------------------------|
| <b>M<sub>i</sub></b> | <b>A</b>                   | <b>B</b> | <b>C</b> | <b>D</b> | <b>p(M<sub>i</sub> y)</b> |
| 1                    | 1                          | 0        | 1        | 0        | 0.42                      |
| 2                    | 1                          | 0        | 0        | 0        | 0.14                      |
| 3                    | 0                          | 1        | 1        | 0        | 0.13                      |
| 4                    | 1                          | 1        | 1        | 0        | 0.09                      |
| 5                    | 1                          | 0        | 0        | 1        | 0.05                      |
| 6                    | 0                          | 0        | 0        | 0        | 0.04                      |
| 7                    | 0                          | 1        | 0        | 0        | 0.04                      |
| 8                    | 1                          | 1        | 0        | 0        | 0.03                      |
| 9                    | 0                          | 0        | 1        | 0        | 0.02                      |
| 10                   | 0                          | 0        | 0        | 1        | 0.01                      |
| 11                   | 0                          | 1        | 0        | 1        | 0.01                      |
| 12                   | 1                          | 1        | 0        | 1        | 0.01                      |
| 13                   | 0                          | 0        | 1        | 1        | 0.01                      |
| 14                   | 1                          | 0        | 1        | 1        | 0.00                      |
| 15                   | 0                          | 1        | 1        | 1        | 0.00                      |
| 16                   | 1                          | 1        | 1        | 1        | 0.00                      |

**Table E5.5** Posterior model probability  $p(M_i|y)$  using a normally distributed prior for  $\beta_k$ :  $N(0, 10^6)$ . See Column A: The MR model considers the covariate *sst\_anomaly\_austral* for chick survival; Column B: The MR model considers the covariate *days\_wind\_gusts\_33\_annual* for chick survival; Column C: The MR model considers the covariate *sst\_anomaly\_austral* for adult survival; Column D: The MR model considers the covariate *mean\_air\_temp\_annual* for adult survival.

|                      | <b>Model configuration</b> |          |          |          |                           |
|----------------------|----------------------------|----------|----------|----------|---------------------------|
| <b>M<sub>i</sub></b> | <b>A</b>                   | <b>B</b> | <b>C</b> | <b>D</b> | <b>p(M<sub>i</sub> y)</b> |
| 1                    | 1                          | 0        | 1        | 0        | 0.43                      |
| 2                    | 1                          | 0        | 0        | 1        | 0.13                      |
| 3                    | 0                          | 1        | 1        | 0        | 0.12                      |
| 4                    | 1                          | 1        | 1        | 0        | 0.08                      |
| 5                    | 0                          | 0        | 0        | 0        | 0.06                      |
| 6                    | 1                          | 0        | 0        | 0        | 0.05                      |
| 7                    | 0                          | 1        | 0        | 0        | 0.04                      |
| 8                    | 1                          | 1        | 0        | 0        | 0.03                      |
| 9                    | 0                          | 0        | 1        | 0        | 0.02                      |
| 10                   | 0                          | 0        | 0        | 1        | 0.01                      |
| 11                   | 0                          | 1        | 0        | 1        | 0.01                      |
| 12                   | 1                          | 1        | 0        | 1        | 0.01                      |
| 13                   | 0                          | 0        | 1        | 1        | 0.01                      |
| 14                   | 1                          | 0        | 1        | 1        | 0.00                      |
| 15                   | 0                          | 1        | 1        | 1        | 0.00                      |
| 16                   | 1                          | 1        | 1        | 1        | 0.00                      |

**Table E5.6** Posterior model probability  $p(M_i|y)$  using a normally distributed prior for  $\beta_k$ :  $N(0.2, 100)$ . Column A: The MR model considers the covariate *sst\_anomaly\_austral* for chick survival; Column B: The MR model considers the covariate *days\_wind\_gusts\_33\_annual* for chick survival; Column C: The MR model considers the covariate *sst\_anomaly\_austral* for adult survival; Column D: The MR model considers the covariate *mean\_air\_temp\_annual* for adult survival.

|       | Model configuration |   |   |   |            |
|-------|---------------------|---|---|---|------------|
| $M_i$ | A                   | B | C | D | $p(M_i y)$ |
| 1     | 1                   | 0 | 1 | 0 | 0.47       |
| 2     | 1                   | 0 | 0 | 0 | 0.16       |
| 3     | 0                   | 1 | 1 | 0 | 0.11       |
| 4     | 1                   | 1 | 1 | 0 | 0.10       |
| 5     | 1                   | 0 | 0 | 1 | 0.04       |
| 6     | 0                   | 0 | 0 | 0 | 0.03       |
| 7     | 0                   | 1 | 0 | 0 | 0.03       |
| 8     | 1                   | 1 | 0 | 0 | 0.02       |
| 9     | 0                   | 0 | 1 | 0 | 0.02       |
| 10    | 0                   | 0 | 0 | 1 | 0.01       |
| 11    | 0                   | 1 | 0 | 1 | 0.01       |
| 12    | 1                   | 1 | 0 | 1 | 0.00       |
| 13    | 0                   | 0 | 1 | 1 | 0.00       |
| 14    | 1                   | 0 | 1 | 1 | 0.00       |
| 15    | 0                   | 1 | 1 | 1 | 0.00       |
| 16    | 1                   | 1 | 1 | 1 | 0.00       |

## References

Gelman, A., & Rubin, D. B. (1992). Inference from iterative simulation using multiple sequences. *Statistical science*, 7(4), 457-472.

Hooten, M. B., & Hobbs, N. T. (2015). A guide to Bayesian model selection for ecologists. *Ecological Monographs*, 85(1), 3-28.

Ntzoufras, I. (2002). Gibbs variable selection using BUGS. *Journal of Statistical Software*, 7(7), 1-19.

Tenan, S., O'Hara, R. B., Hendriks, I., & Tavecchia, G. (2014). Bayesian model selection: the steepest mountain to climb. *Ecological Modelling*, 283, 62-69.
